# Supplementary material for: Mechanochemical reduction of alkyl and aryl halides using mesoporous zinc oxide
Source: Royal Society of Chemistry journal article supplement (doi:10.1039/d4cc01178c), 2024-01-01

# **Mechanochemical Reduction of Alkyl and Aryl Halides Using Mesoporous Zinc Oxide**

Zhengheng Li,<sup>a</sup> Longfei Zhang,<sup>a</sup> Ran Ding,<sup>a</sup> Jian Wang,<sup>a</sup> Du Chen,<sup>a</sup> Ziyue Ren,<sup>a</sup> Chengqiang Ding,<sup>a</sup> Kai Chen,<sup>a</sup> Jialin Wang,<sup>a</sup> and Zhao Wang<sup>\*a</sup>

*<sup>a</sup>State and Local Joint Engineering Laboratory for Novel Functional Polymeric Materials, Jiangsu Key Laboratory of Advanced Functional Polymer Design and Application, Suzhou Key Laboratory of Macromolecular Design and Precision Synthesis, College of Chemistry, Chemical Engineering and Materials Science, Soochow University, Suzhou 215123, China*

## Supporting Information

### Table of Contents

|                                                                           |    |
|---------------------------------------------------------------------------|----|
| 1. General information .....                                              | 3  |
| 2. Synthesis of m-ZnO .....                                               | 3  |
| 3. PFM characterization of c-ZnO .....                                    | 4  |
| 4. XRD pattern of m-ZnO nanoparticles. ....                               | 4  |
| 5. BET characterization of m-ZnO before reaction .....                    | 4  |
| 6. Instruments and experimental steps .....                               | 5  |
| 7. Gram-scale synthesis .....                                             | 6  |
| 8. Reaction kinetics of alkyl bromide .....                               | 6  |
| 9. Characterization of recycled mechanoredox catalyst .....               | 7  |
| 10. BET characterization of m-ZnO after reaction .....                    | 7  |
| 11. SEM and TEM characterization of m-ZnO before and after reaction ..... | 7  |
| 12. XRD characterization of m-ZnO before and after reaction .....         | 8  |
| 13. Reaction temperature confirmed by thermography .....                  | 8  |
| 14. Optimization of reaction conditions .....                             | 9  |
| 15. Radical trapping experiment .....                                     | 10 |
| 16. General procedure for mechanoredox reaction .....                     | 12 |
| 17. Characterization of hydrodebromination products .....                 | 12 |
| 18. NMR Spectra of hydrodebromination products .....                      | 19 |

## 1. General information

Unless otherwise noted, materials were purchased from commercial suppliers and used without further purification. All the solvents were treated according to standard methods. Ball milling experiment were performed using 1.5 mL stain-less steel jar with 5 mm stain-less steel ball in Retsch MM400 (Figure S1-S2). Reactions were monitored by thin layer chromatography (TLC) and visualized by a dual short wave UV lamp and stain with potassium permanganate solution or iodine tank. Flash column chromatography was performed using 300-400 mesh silica gel (Huanghai, 22040C).  $^1\text{H}$  NMR spectra were recorded on 400 MHz spectrophotometers (AvanceIII HD-400, Bruker). Chemical shifts ( $\delta$ ) are reported in ppm from the resonance of tetramethyl silane as the internal standard (TMS: 0.00 ppm). Data are reported as follows: chemical shift, multiplicity (s = singlet, d = doublet, t = triplet, dd = doublet of doublets, m = multiplet), coupling constants (Hz) and integration.  $^{13}\text{C}$  NMR spectra were recorded on 100MHz with complete proton decoupling spectrophotometers ( $\text{CDCl}_3$ : 77.0 ppm). High resolution mass spectra (HR-MS) were obtained on a Waters® GCT Premier high resolution mass spectrometer. The structures of the m-ZnO were characterized by X-ray diffraction (XRD) employing an X-ray diffractometer (D8 Advance, Bruker Inc.). The morphology of m-ZnO was observed with scanning electron microscope (SEM) (Regulus 8100, Hitachi) and transmission electron microscope (TEM) (Talos F200X G2, FEI). The specific surface areas were carried by the Bruanuer-Emmett-Teller (BET) method with the Micrometrics ASAP 2460 according to  $\text{N}_2$  physisorption isotherms at 77 K. The pretreatment was done for 12 h through heat degradation at 573 K under vacuum condition. Gas chromatography-mass spectrometry (GC-MS) were recorded on Agilent 8860-5977C under helium atmosphere.

## 2. Synthesis of m-ZnO

m-ZnO material was synthesized via a hydrothermal method using F-127 as the template reagent. In a typical experiment, a solution containing 0.025 mol of  $\text{Zn}(\text{CH}_3\text{COO})\cdot 2\text{H}_2\text{O}$  and 0.5 mol of  $\text{CO}(\text{NH}_2)_2$  was prepared in 150 mL of deionized water at room temperature. Subsequently, F-127 ( $0.025 \times 10^{-3}$  mol) was added to the solution with continuous stirring, resulting in a transparent solution. The solution was further stirred at the same temperature for 2 hours. Then, it was transferred to teflon-lined sealed stainless-steel autoclaves and subjected to hydrothermal treatment at  $90^\circ\text{C}$  for 24 hours. After natural cooling to room temperature (R.T.), the obtained product was washed several times with deionized water to neutrality and dried at  $80^\circ\text{C}$  in ambient air overnight. Finally, the template was removed by calcination in static air at  $400^\circ\text{C}$  for 2 hours.

### 3. PFM characterization of c-ZnO

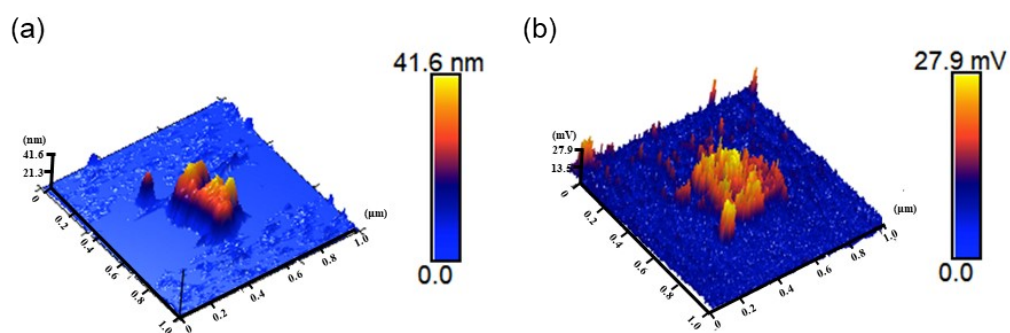

Figure S1 (a) 3D topographic image of c-ZnO. (b) 3D potential distribution diagram of c-ZnO.

### 4. XRD pattern of m-ZnO nanoparticles.

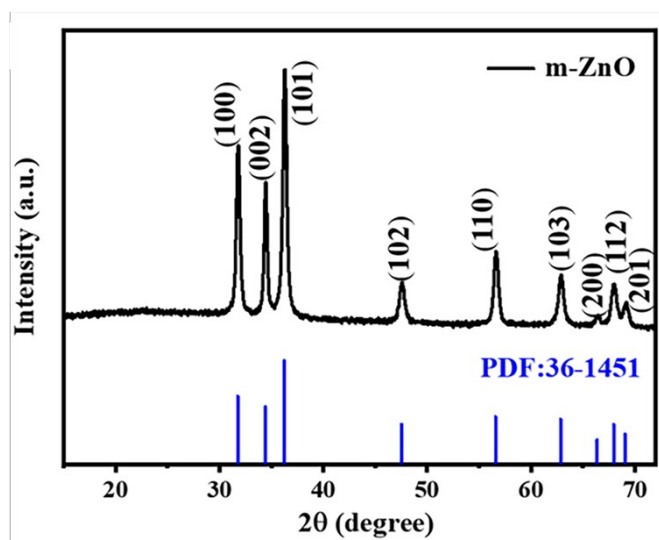

Figure S2. XRD pattern of m-ZnO nanoparticles.

### 5. BET characterization of m-ZnO before reaction

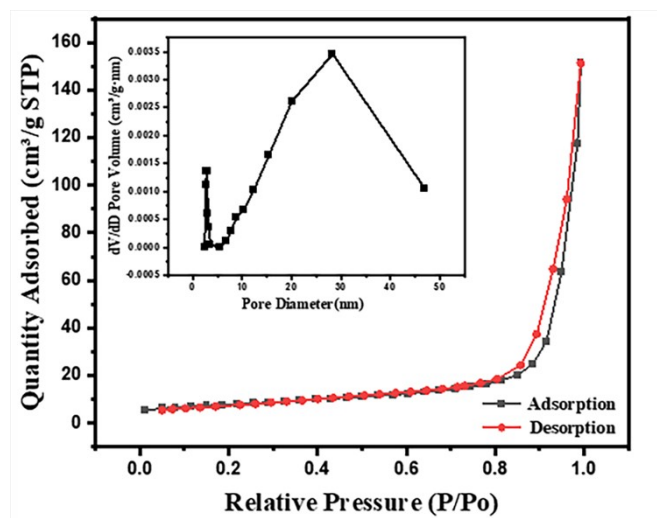

Figure S3 N<sub>2</sub> isotherm and pore-size distribution of m-ZnO before reaction.

## 6. Instruments and experimental steps

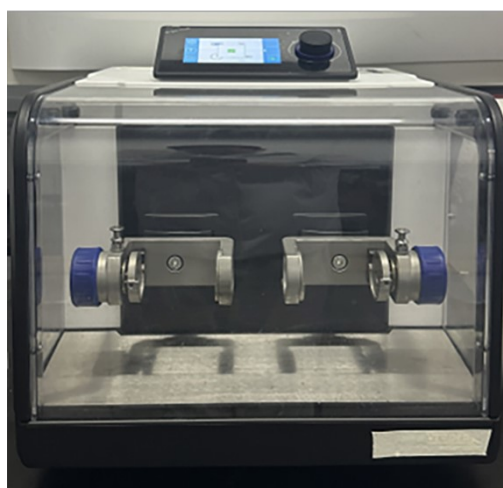

Figure S4. Retsch MM400 used in this study.

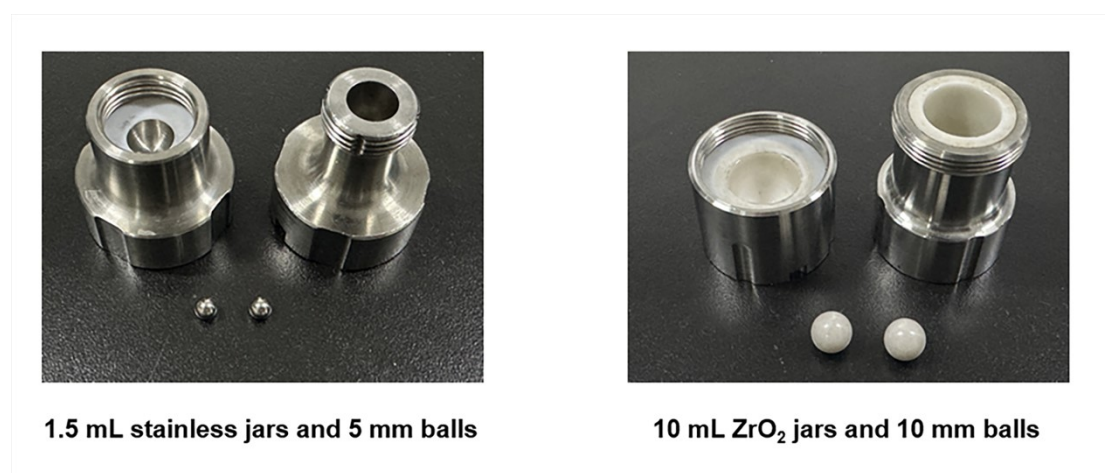

Figure S5. Stain-less and ZrO<sub>2</sub> jars and balls used in this study.

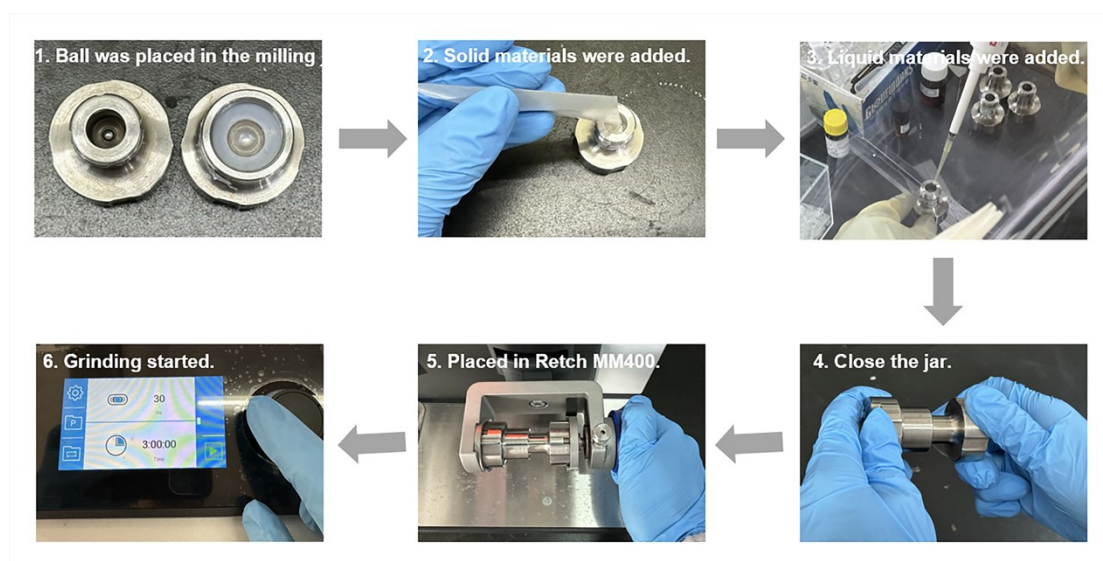

**Figure S6.** Procedures and experimental setup for mechanoredox reactions.

## 7. Gram-scale synthesis

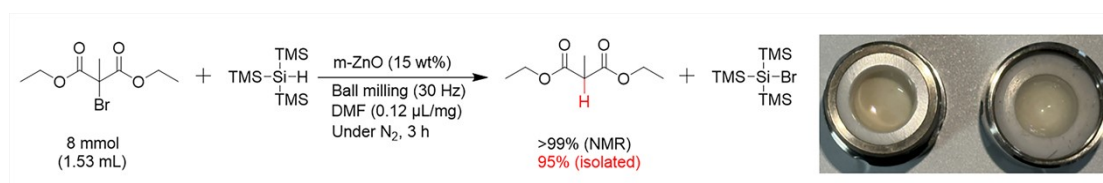

**Figure S7.** Exploration of a gram-scale synthesis.

## 8. Reaction kinetics of alkyl bromide

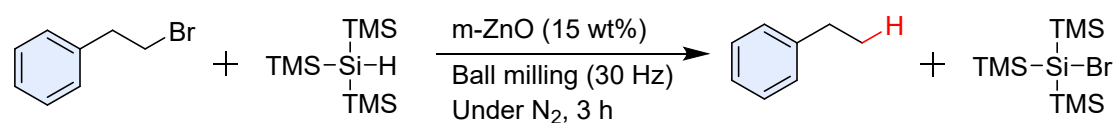

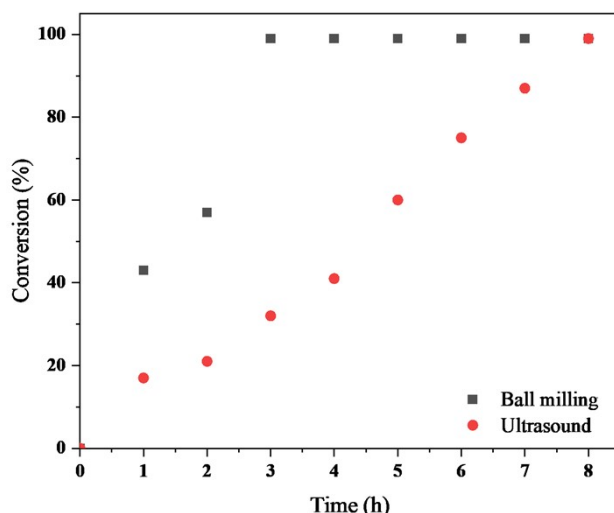

**Figure S8.** The comparison of reaction kinetics under ball milling and ultrasound conditions (25 °C, 40 kHz, 110 W).

**Table S1.** The summary of reaction times required for the complete reaction under different conditions.

| Entry          | Method         | Conditions    | Reaction time (h) | Yield (%) <sup>b</sup> | Ref.      |
|----------------|----------------|---------------|-------------------|------------------------|-----------|
| 1              | Solid-state    | Ball milling  | 3                 | 99                     | This work |
| 2 <sup>a</sup> | Solution-state | Ultrasound    | 8                 | 99                     | This work |
| 3              | Solution-state | Visible light | 10                | 99                     | 21        |

<sup>[a]</sup>Reaction condition: Phenethyl bromide (0.4 mmol), TTMSS (0.8 mmol) and *m*-ZnO (15 wt%) were combined in DMF (0.5 mL) and under ultrasound for 8 hours (25 °C, 40 kHz, 110 W). <sup>[b]</sup>Yields were determined by <sup>1</sup>H NMR.

## 9. Characterization of recycled mechanoredox catalyst

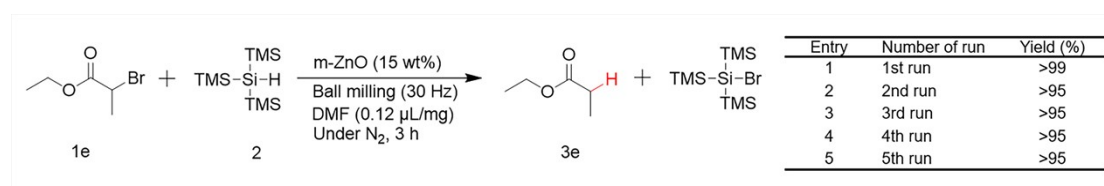

**Figure S9.** *m*-ZnO recycling experiments.

## 10. BET characterization of *m*-ZnO after reaction

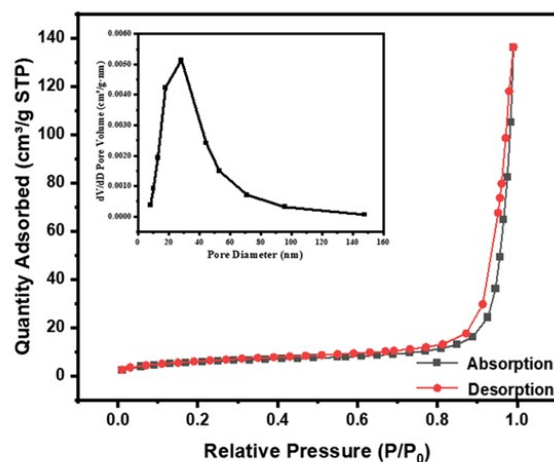

**Figure S10.**  $N_2$  isotherm and pore-size distribution of m-ZnO after reaction.

## 11. SEM and TEM characterization of m-ZnO before and after reaction

The m-ZnO sample after ball milling was prepared by using Retsch MM 400 (1.5 mL jar, 5 mm ball, 30 Hz, 3 h). Additional images were shown in Figure S5 and Figure S6.

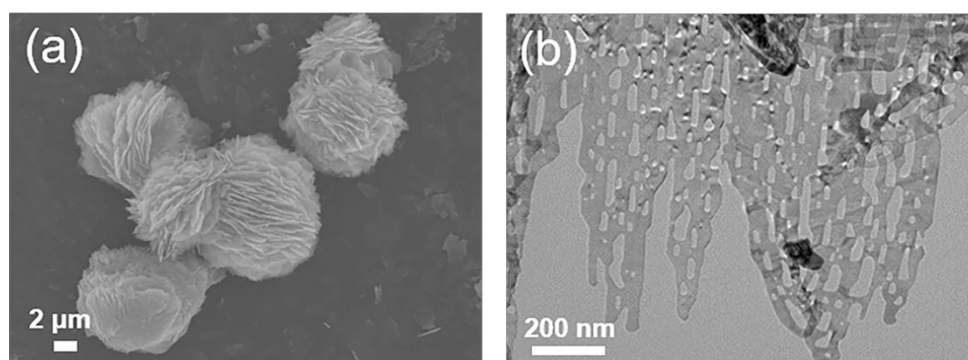

**Figure S11.** (a) SEM and (b) TEM image of m-ZnO before ball milling.

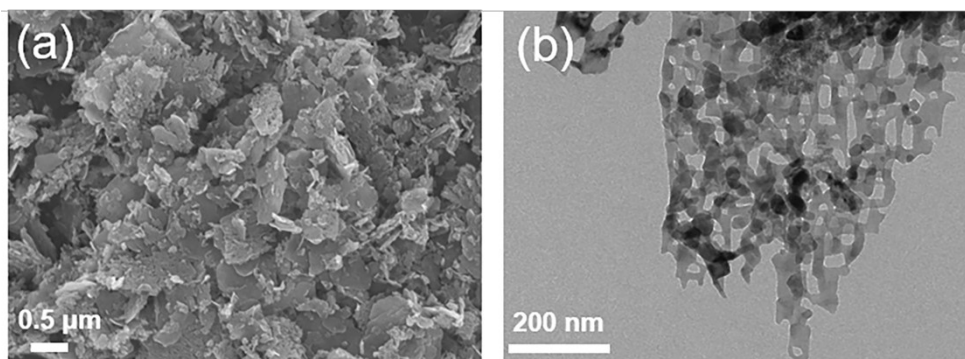

**Figure S12.** (a) SEM and (b) TEM image of m-ZnO after ball milling (30 Hz, 3 h).

## 12. XRD characterization of m-ZnO before and after reaction



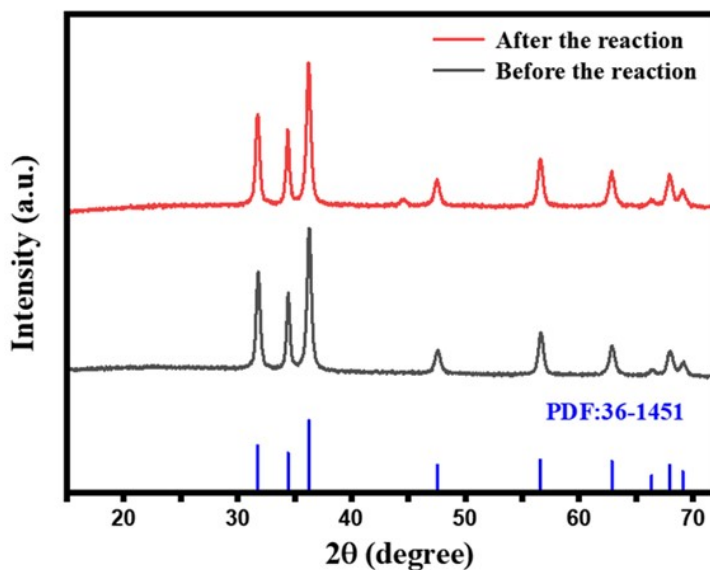

Figure S13. XRD patterns of m-ZnO before and after the reaction.

### 13. Reaction temperature confirmed by thermography

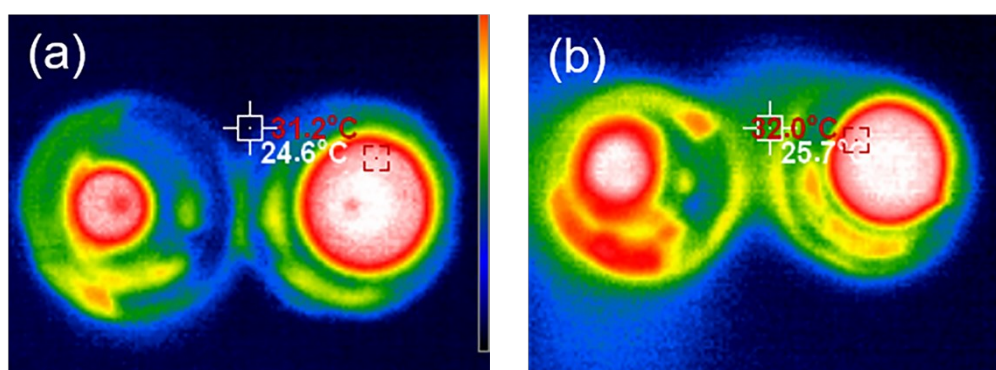

Figure S14. Temperature inside the milling jar (a) after reaction 90 min and (b) 180 min confirmed by thermography.

### 14. Optimization of reaction conditions

Table S2. Impact of catalyst loading.

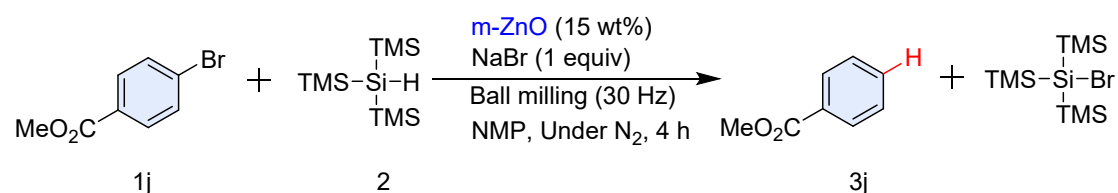

| Entry | Variation from initial conditions <sup>a</sup> | Yield(%) <sup>b</sup> |
|-------|------------------------------------------------|-----------------------|
| 1     | None                                           | 51                    |
| 2     | 5 wt% catalyst loading                         | 83                    |
| 3     | 1 wt% catalyst loading                         | 24                    |

<sup>[a]</sup>Initial conditions: 1j (0.4 mmol), TTMS (0.8 mmol), NaBr (0.4 mmol), NMP as LAG (1  $\mu\text{L}/\text{mg}$ ) and m-ZnO (15 wt%) were added in a stain-less steel milling jar (1.5 mL) with a stain-

less steel ball (diameter, 5 mm) and react in N<sub>2</sub> atmosphere for 4 h. <sup>[b]</sup>Yields were determined by <sup>1</sup>H NMR.

**Table S3.** Impact of bromide ions.

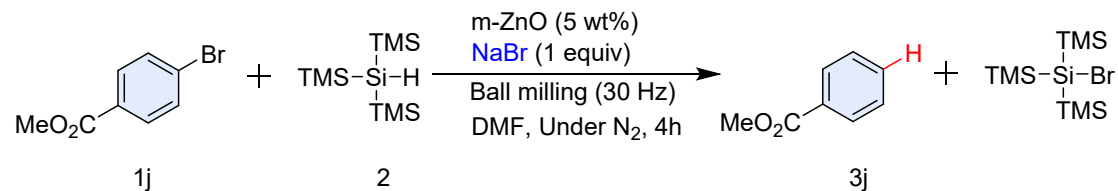

| Entry | Variation from initial conditions <sup>a</sup> | Yield(%) <sup>b</sup> |
|-------|------------------------------------------------|-----------------------|
| 1     | No additive                                    | <10                   |
| 2     | NaBr as additive                               | 31                    |
| 3     | KBr as additive                                | 22                    |
| 4     | LiBr as additive                               | <10                   |

<sup>[a]</sup>Initial conditions: 1j (0.4 mmol), TTMSS (0.8 mmol), bromide salts (0.4 mmol), DMF as LAG (0.12 μL/mg) and m-ZnO (5 wt%) were added in a stain-less steel milling jar (1.5 mL) with a stain-less steel ball (diameter, 5 mm) and react in N<sub>2</sub> atmosphere for 3h. <sup>[b]</sup> Yields were determined by <sup>1</sup>H NMR.

**Table S4.** Evaluation the effects of LAG.

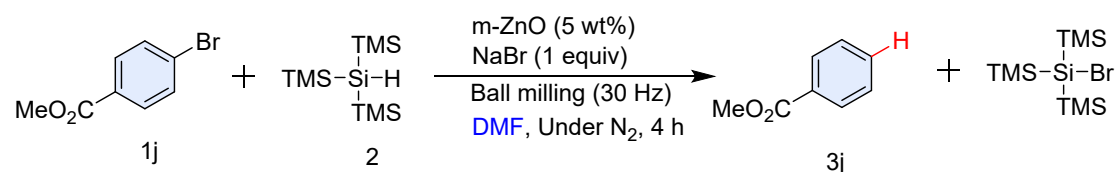

| Entry | Variation from initial conditions <sup>a</sup> | Yield (%) <sup>b</sup> |
|-------|------------------------------------------------|------------------------|
| 1     | None                                           | 28                     |
| 2     | MeCN                                           | Trace                  |
| 3     | DMA                                            | 37                     |
| 4     | NMP                                            | 83                     |
| 5     | 1,4-Dioxane                                    | 7                      |
| 6     | THF                                            | Trace                  |
| 7     | DMSO                                           | 11                     |

<sup>[a]</sup>Initial conditions: 1j (0.4 mmol), TTMSS (0.8 mmol), NaBr (0.4 mmol), DMF as LAG (1  $\mu$ L/mg) and m-ZnO (5 wt%) were added in a stain-less steel milling jar (1.5 mL) with a stain-less steel ball (diameter, 5 mm) and react in N<sub>2</sub> atmosphere for 4 h. <sup>[b]</sup>Yields were determined by <sup>1</sup>H NMR.

## 15.Radical trapping experiment

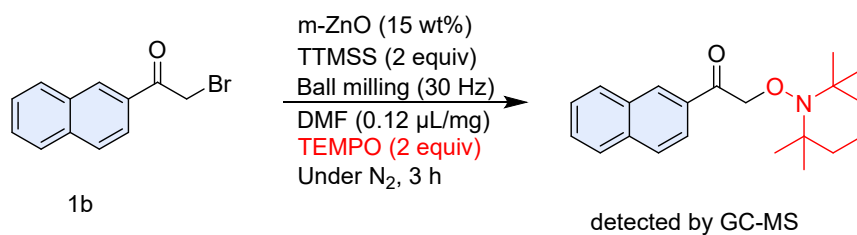

2-Bromo-2'-acetonaphthone (99.6 mg, 0.4 mmol), DMF as LAG (0.12  $\mu$ L/mg), 2,2,6,6-tetramethylpiperidinyloxy (TEMPO, 125 mg, 0.8 mmol) and m-ZnO (63.1 mg, 15 wt%) were placed in a stain-less steel milling jar (1.5 mL) with a stain-less steel ball (5.0 mm, diameter) in glove box. Then TTMSS (2, 248.66  $\mu$ L, 0.8 mmol) was added to the mixture. After the jar was closed with the purge with inert gas, it was placed in the ball mill (Retsch MM 400, 3 h, 30 Hz) for reaction. The adduct of aryl radical with TEMPO (3) were detected by GC-MS (Figure S11).

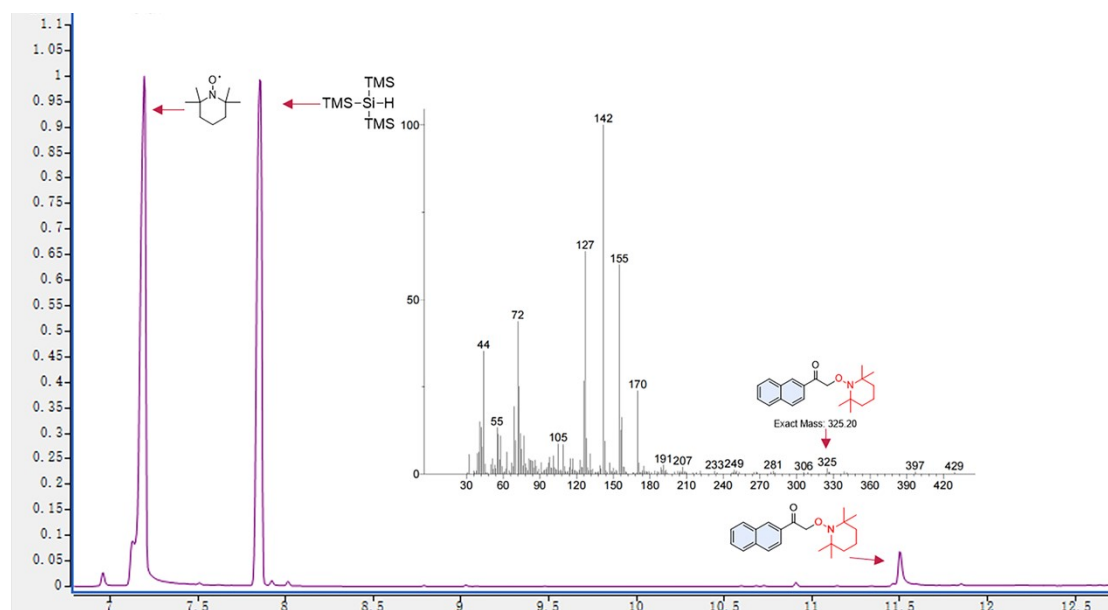

**Figure S15.** GC-MS spectra of radical trapping experiment with TEMPO.

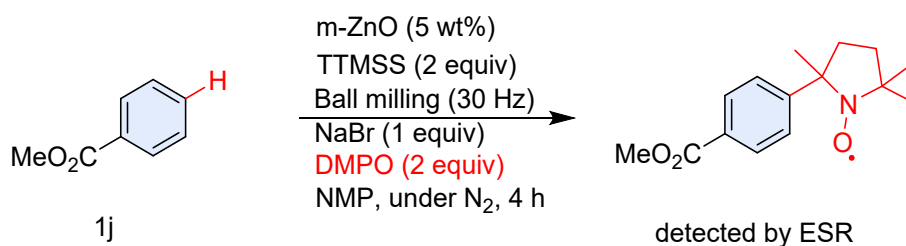



Methyl 4-bromobenzoate (1j, 0.4 mmol), ZnO nanoparticles (32.1 mg, 5 wt%), NMP as LAG (1  $\mu\text{L}/\text{mg}$ ) and 0.4 mmol NaBr were placed in a stain-less steel milling jar (1.5 mL) with a stain-less steel ball (5.0 mm, diameter) in glove box. Then TTMS (2, 0.8 mmol 248.66  $\mu\text{L}$ ) was added to the mixture. After the jar was closed with the purge with inert gas, it was placed in the ball mill (Retsch MM 400, 4 h, 30 Hz) for reaction. After reaction, 5 g of KF on Alumina (37 wt%) were added and stirred for 30 min. The crude material was purified by flash chromatography ( $\text{SiO}_2$ , hexane/ethyl acetate) to give the arylation product 3j.

## 17.Characterization of hydrodebromination products

### Benzyl acetate (3a)

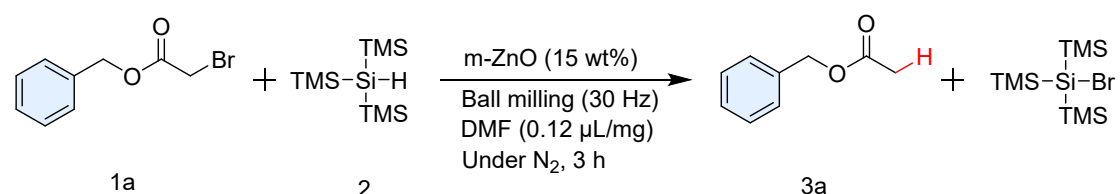

According to general procedure A, benzyl 2-bromoacetate (65.4  $\mu\text{L}$ , 0.4 mmol) afforded benzyl acetate in 94% yield (53.6  $\mu\text{L}$ , 0.37 mmol) as a colorless transparent liquid by flash column chromatography (hexane/ethyl acetate).

$^1\text{H NMR}$  (400 MHz,  $\text{CDCl}_3$ ,  $\delta$ ): 7.38 – 7.33 (m, 4H), 7.36 – 7.25 (m, 1H), 5.10 (s,  $J = 0.6$  Hz, 2H), 2.09 (s, 3H).  $^{13}\text{C NMR}$  (100 MHz,  $\text{CDCl}_3$ ,  $\delta$ ): 170.83, 136.31, 128.54, 128.44, 128.22, 66.35, 20.88. HRMS-EI ( $m/z$ ):  $[\text{M}]^+$  calcd for  $\text{C}_9\text{H}_{10}\text{O}_2$ , 150.0681; found, 150.0684.

### 2-Acetonaphthone (3b)

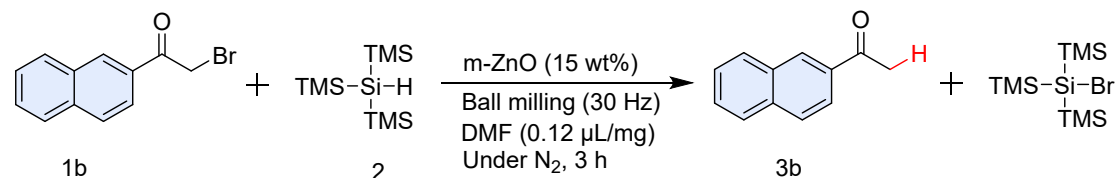

According to general procedure A, 2-Bromo-2'-acetonaphthone (99.6 mg, 0.4 mmol) afforded 2-Acetonaphthone in 72% yield (49.5 mg, 0.28 mmol) as white fine crystal powder by flash column chromatography (hexane/ethyl acetate).

$^1\text{H NMR}$  (400 MHz,  $\text{CDCl}_3$ ,  $\delta$ ): 8.40 (dd,  $J = 2.8, 1.3$  Hz, 1H), 8.21 (dt,  $J = 7.8, 1.7$  Hz, 1H), 7.97 – 7.90 (m, 2H), 7.74 (dd,  $J = 8.5, 1.7$  Hz, 1H), 7.65 – 7.52 (m, 2H), 2.64 (s, 3H).  $^{13}\text{C NMR}$  (100 MHz,  $\text{CDCl}_3$ ,  $\delta$ ): 197.55, 135.59, 134.63, 133.51, 130.64, 130.21, 128.20, 128.08, 127.28, 126.75, 124.79, 26.61. HRMS-EI ( $m/z$ ):  $[\text{M}]^+$  calcd for  $\text{C}_{12}\text{H}_{10}\text{O}$ , 170.0732; found, 170.0729.

### Diethyl malonate (3c)

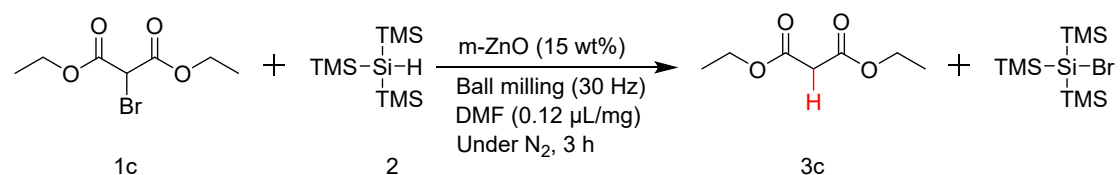

According to general procedure A, diethyl 2-bromomalonate (68.3  $\mu\text{L}$ , 0.4 mmol) afforded diethyl malonate in 92% yield (55.2  $\mu\text{L}$ , 0.37 mmol) as a colorless transparent liquid by flash column chromatography (hexane).

$^1\text{H}$  NMR (400 MHz,  $\text{CDCl}_3$ ,  $\delta$ ): 4.18 (dd,  $J = 6.6$  Hz, 4H), 3.38 (s, 2H), 1.25 (t,  $J = 6.6$  Hz, 6H).  $^{13}\text{C}$  NMR (100 MHz,  $\text{CDCl}_3$ ,  $\delta$ ): 166.19, 61.37, 41.61, 14.06. HRMS-EI ( $m/z$ ):  $[\text{M}]^+$  calcd for  $\text{C}_7\text{H}_{12}\text{O}_4$ , 160.0736; found, 160.0737.

### Ethyl 2-phenylacetate (3d)

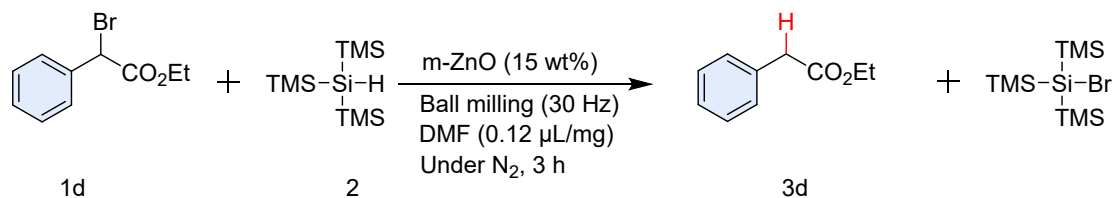

According to general procedure A, ethyl 2-bromo-2-phenylacetate (70.4  $\mu\text{L}$ , 0.4 mmol) afforded ethyl 2-phenylacetate in 94% yield (57.0  $\mu\text{L}$ , 0.37 mmol) as a colorless transparent liquid by flash column chromatography (hexane/ethyl acetate).

$^1\text{H}$  NMR (400 MHz,  $\text{CDCl}_3$ ,  $\delta$ ): 7.31 – 7.20 (m, 4H), 4.14 (dd,  $J = 6.6$  Hz, 2H), 3.56 (d,  $J = 0.7$  Hz, 2H), 1.24 (t,  $J = 6.6$  Hz, 3H).  $^{13}\text{C}$  NMR (100 MHz,  $\text{CDCl}_3$ ,  $\delta$ ): 171.33, 134.80, 129.46, 129.03, 127.28, 60.77, 41.44, 14.15. HRMS-EI ( $m/z$ ):  $[\text{M}]^+$  calcd for  $\text{C}_{10}\text{H}_{12}\text{O}_2$ , 164.0837; found, 164.0840.

### Ethyl 2-bromopropionate (3e)

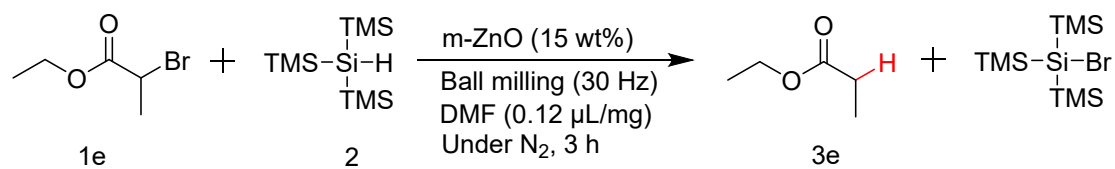

According to general procedure A, ethyl 2-bromopropionate (55.6  $\mu\text{L}$ , 0.4 mmol) afforded ethyl propionate in 94% yield (58.9  $\mu\text{L}$ , 0.37 mmol) as a colorless transparent liquid by flash column chromatography (hexane).

$^1\text{H}$  NMR (400 MHz,  $\text{CDCl}_3$ ,  $\delta$ ): 4.15 (dd,  $J = 6.6$  Hz, 2H), 2.37 (dd,  $J = 8.0$  Hz, 2H), 1.24 (t,  $J = 6.6$  Hz, 3H), 1.13 (t,  $J = 8.0$  Hz, 3H).  $^{13}\text{C}$  NMR (100 MHz,  $\text{CDCl}_3$ ,  $\delta$ ): 173.79, 60.05, 27.76, 14.26, 9.18. HRMS-EI ( $m/z$ ):  $[\text{M}]^+$  calcd for  $\text{C}_5\text{H}_{10}\text{O}_2$ , 102.0681; found, 102.0680.

### 4-Bromopropiophenone (3f)

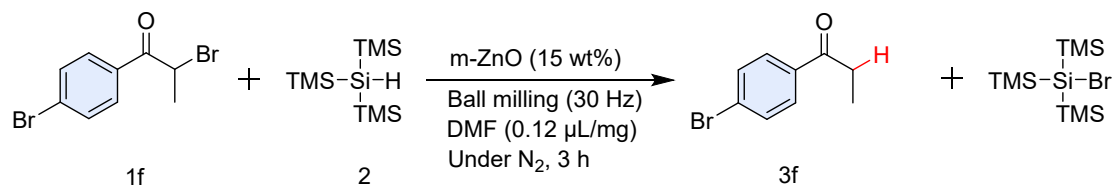

According to general procedure A, 2,4'-Dibromopropiophenone (116.8 mg, 0.4 mmol) afforded 4-Bromopropiophenone in 95% yield (81.03 mg, 0.38 mmol) as white light yellow powder by flash column chromatography (hexane/ethyl acetate).

$^1\text{H}$  NMR (400 MHz,  $\text{CDCl}_3$ ,  $\delta$ ): 7.84 – 7.78 (m, 2H), 7.65 – 7.59 (m, 2H), 3.32 (dd,  $J = 7.6$  Hz, 2H), 1.21 (t,  $J = 7.6$  Hz, 3H).  $^{13}\text{C}$  NMR (100 MHz,  $\text{CDCl}_3$ ,  $\delta$ ): 200.02, 135.38, 131.86, 130.08, 129.07, 31.72, 8.37. HRMS-EI ( $m/z$ ):  $[\text{M}]^+$  calcd for  $\text{C}_9\text{H}_9\text{BrO}$ , 211.9837; found, 211.9836.

### Diethyl 2-methylmalonate (3g)

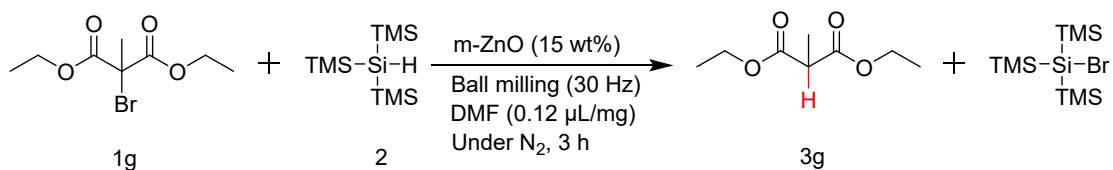

According to general procedure A, diethyl 2-bromomalonate (68.3 μL, 0.4 mmol) afforded diethyl malonate in 95% yield (57.8 μL, 0.38 mmol) as a colorless transparent liquid by flash column chromatography (hexane).

<sup>1</sup>H NMR (400 MHz, CDCl<sub>3</sub>, δ): 4.22 – 4.09 (m, 4H), 3.41 (q, *J* = 8.4 Hz, 1H), 1.37 (d, 3H), 1.23 (t, *J* = 6.4 Hz, 6H). <sup>13</sup>C NMR (100 MHz, CDCl<sub>3</sub>, δ): 169.94, 61.14, 46.07, 14.18, 13.66. HRMS-EI (*m/z*): [M]<sup>+</sup> calcd for C<sub>8</sub>H<sub>14</sub>O<sub>4</sub>, 174.0892; found, 174.0890.

#### Phenetole (3h)

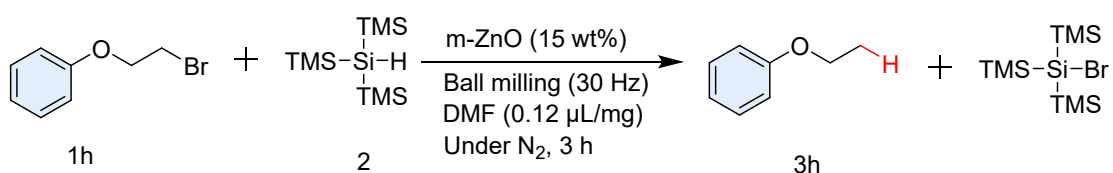

According to general procedure A, 2-phenoxyethyl bromide (55.4 μL, 0.4 mmol) afforded phenetole in 94% yield (47.6 μL, 0.37 mmol) as a colorless transparent liquid by flash column chromatography (hexane/ethyl acetate).

<sup>1</sup>H NMR (400 MHz, CDCl<sub>3</sub>, δ): 7.30 – 7.27 (dd, 2H), 7.01 – 6.98 (tt, 1H), 6.89– 6.87 (m, 2H), 4.01– 4.03 (q, 2H), 1.42 (t, 3H). <sup>13</sup>C NMR (100 MHz, CDCl<sub>3</sub>, δ): 158.96, 129.73, 121.37, 114.67, 63.67, 14.69. HRMS-EI (*m/z*): [M]<sup>+</sup> calcd for C<sub>8</sub>H<sub>10</sub>O, 122.0732; found, 122.0733.

#### 2-Ethylanisole (3i)

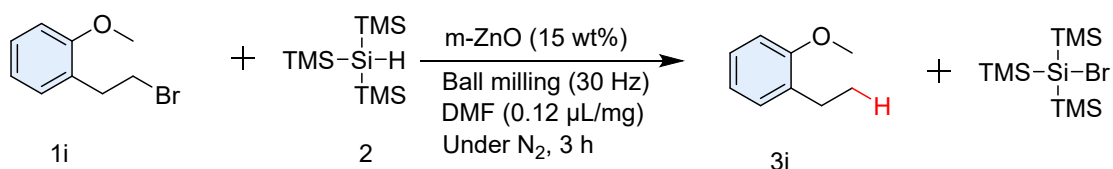

According to general procedure A, 2-methoxyphenethyl bromide (63.7 μL, 0.4 mmol) afforded 2-ethylanisole in 92% yield (52.2 μL, 0.37 mmol) as a colorless transparent liquid by flash column chromatography (hexane/ethyl acetate).

<sup>1</sup>H NMR (400 MHz, CDCl<sub>3</sub>, δ): 7.24 – 7.20 (dd, 1H), 7.17 – 7.15 (ddt, 1H), 6.99– 6.96 (td, 1H), 6.86– 6.84 (dd, 1H), 3.78 (s, 3H), 2.69– 2.64 (qd, 2H), 1.21–1.18 (t, 3H). <sup>13</sup>C NMR (100 MHz, CDCl<sub>3</sub>, δ): 157.34, 132.58, 128.94, 126.90, 120.59, 110.27, 55.21, 23.36, 14.22. HRMS-EI (*m/z*): [M]<sup>+</sup> calcd for C<sub>9</sub>H<sub>12</sub>O, 136.0888; found, 136.0891.

#### 4-Ethylanisole (3j)

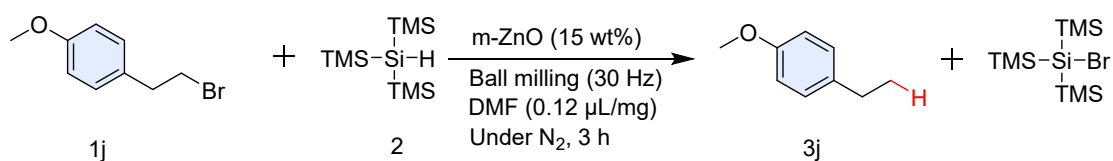

According to general procedure A, 4-Methoxyphenethyl bromide (63.7  $\mu\text{L}$ , 0.4 mmol) afforded 4-Ethylanisole in 93% yield (50.2  $\mu\text{L}$ , 0.37 mmol) as a colorless transparent liquid by flash column chromatography (hexane/ethyl acetate).

$^1\text{H}$  NMR (400 MHz,  $\text{CDCl}_3$ ,  $\delta$ ): 7.12 - 7.10 (m, 2H), 6.83 - 6.80 (m, 2H), 3.80 (s, 3H), 2.65-2.60 (qt, 2H), 1.23-1.20 (t, 3H).  $^{13}\text{C}$  NMR (100 MHz,  $\text{CDCl}_3$ ,  $\delta$ ): 158.69, 138.74, 129.18, 110.64, 55.35, 28.47, 15.47. HRMS-EI ( $m/z$ ):  $[\text{M}]^+$  calcd for  $\text{C}_9\text{H}_{12}\text{O}$ , 136.0888; found, 136.0890.

#### Acetophenone (3k)

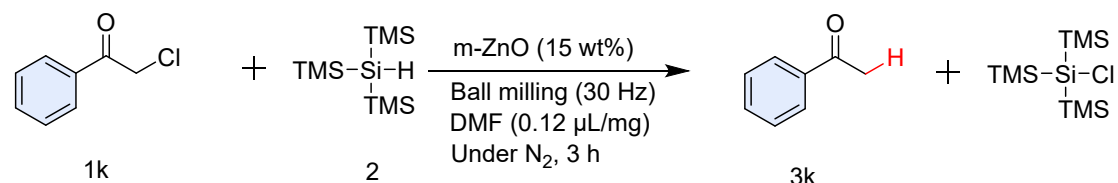

According to general procedure A, 2-Chloroacetophenone (47.3  $\mu\text{L}$ , 0.4 mmol) afforded 1-methoxy-4-methylbenzene in 94% yield (44.4  $\mu\text{L}$ , 0.37 mmol) as light yellow transparent liquid by flash column chromatography (hexane/ethyl acetate).

$^1\text{H}$  NMR (400 MHz,  $\text{CDCl}_3$ ,  $\delta$ ): 7.94 - 7.92 (m, 2H), 7.58 - 7.55 (m, 1H), 7.48 - 7.45 (m, 2H), 2.58 (s, 3H).  $^{13}\text{C}$  NMR (100 MHz,  $\text{CDCl}_3$ ,  $\delta$ ): 198.00, 136.63, 134.45, 129.07, 128.83, 26.38. HRMS-EI ( $m/z$ ):  $[\text{M}]^+$  calcd for  $\text{C}_8\text{H}_{10}\text{O}$ , 120.0568; found, 120.0574.

#### 1-methoxy-4-methylbenzene (3l)

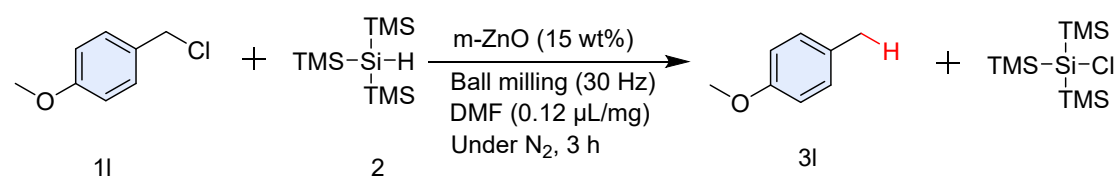

According to general procedure A, 4-Methoxybenzylchloride (56.9  $\mu\text{L}$ , 0.4 mmol) afforded 1-methoxy-4-methylbenzene in 83% yield (42.3  $\mu\text{L}$ , 0.33 mmol) as light yellow transparent liquid by flash column chromatography (hexane/ethyl acetate).

$^1\text{H}$  NMR (400 MHz,  $\text{CDCl}_3$ ,  $\delta$ ): 7.11 - 7.05 (m, 2H), 6.83 - 6.77 (m, 2H), 3.80 (s, 3H), 2.33 (s, 3H).  $^{13}\text{C}$  NMR (100 MHz,  $\text{CDCl}_3$ ,  $\delta$ ): 158.15, 130.28, 129.75, 113.79, 55.35, 20.63. HRMS-EI ( $m/z$ ):  $[\text{M}]^+$  calcd for  $\text{C}_8\text{H}_{10}\text{O}$ , 122.0732; found, 122.0731.

#### Benzonitrile (3m)

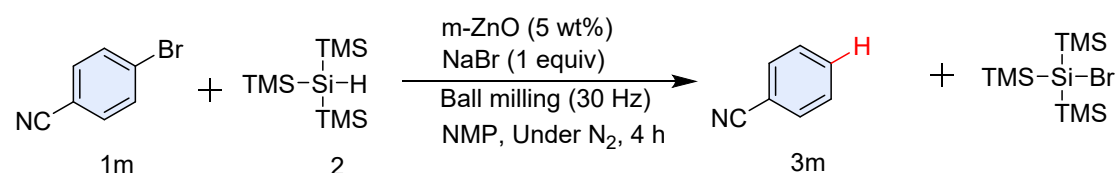

According to general procedure B, 4-bromobenzonitrile (72.8 mg, 0.4 mmol) afforded benzonitrile in 53% yield (21.9  $\mu\text{L}$ , 0.21 mmol) as light yellow transparent liquid by flash column chromatography (hexane/ethyl acetate).

$^1\text{H}$  NMR (400 MHz,  $\text{CDCl}_3$ ,  $\delta$ ): 7.70 - 7.64 (m, 2H), 7.60 - 7.53 (m, 1H), 7.49 - 7.42 (m, 2H).  $^{13}\text{C}$  NMR (100 MHz,  $\text{CDCl}_3$ ,  $\delta$ ): 132.63, 132.47, 128.83, 118.85, 112.68. HRMS-EI ( $m/z$ ):  $[\text{M}]^+$  calcd for  $\text{C}_7\text{H}_5\text{N}$ , 103.0422; found, 103.0423.



### Methyl benzoate (3n)

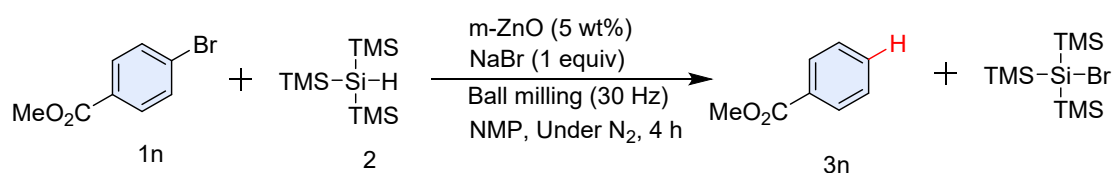

According to general procedure B, methyl 4-bromobenzoate (86.0 mg, 0.4 mmol) afforded methyl benzoate in 71% yield (38.5  $\mu$ L, 0.28 mmol) as light yellow transparent liquid by flash column chromatography (hexane/ethyl acetate).

$^1\text{H NMR}$  (400 MHz,  $\text{CDCl}_3$ ,  $\delta$ ): 8.06 – 7.99 (m, 2H), 7.58 – 7.51 (m, 1H), 7.48 – 7.41 (m, 2H), 3.87 (s, 3H).  $^{13}\text{C NMR}$  (100 MHz,  $\text{CDCl}_3$ ,  $\delta$ ): 167.08, 133.40, 130.50, 129.92, 128.67, 52.10. HRMS-EI ( $m/z$ ):  $[\text{M}]^+$  calcd for  $\text{C}_8\text{H}_8\text{O}_2$ , 136.0524; found, 136.0527.

### Butylbenzene (3o)

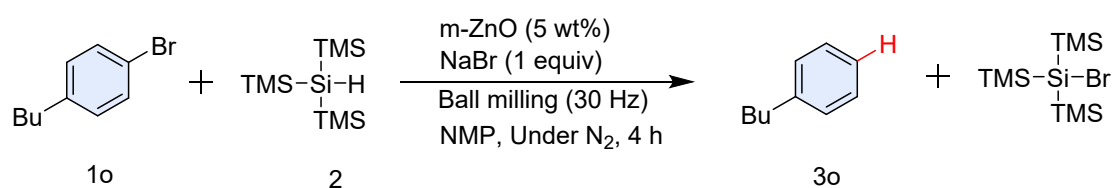

According to general procedure B, 1-bromo-4-butylbenzene (85.2 mg, 0.4 mmol) afforded benzonitrile in 52% yield (30.5  $\mu$ L, 0.22 mmol) as colorless transparent liquid by flash column chromatography (hexane/ethyl acetate).

$^1\text{H NMR}$  (400 MHz,  $\text{CDCl}_3$ ,  $\delta$ ): 7.30 – 7.19 (m, 3H), 7.14 (ddt,  $J = 7.8, 1.7, 0.9$  Hz, 2H), 2.61 (tt,  $J = 8.2, 0.9$  Hz, 2H), 1.62 – 1.52 (tt, 2H), 1.34 (hept,  $J = 6.8$  Hz, 2H), 0.99 (t,  $J = 7.2$  Hz, 3H).  $^{13}\text{C NMR}$  (100 MHz,  $\text{CDCl}_3$ ,  $\delta$ ): 143.15, 128.74, 128.45, 126.53, 35.97, 33.93, 22.84, 13.85. HRMS-EI ( $m/z$ ):  $[\text{M}]^+$  calcd for  $\text{C}_{10}\text{H}_{14}$ , 134.1096; found, 134.1100.

### Anisole (3p)

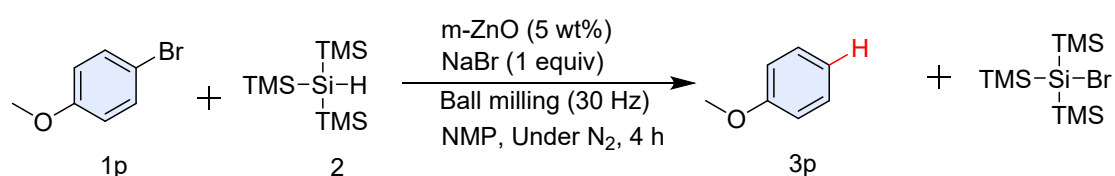

According to general procedure B, 1-bromo-4-methoxybenzene (50.2  $\mu$ L, 0.4 mmol) afforded benzonitrile in 51% yield (22.3  $\mu$ L, 0.20 mmol) as colorless transparent liquid by flash column chromatography (hexane/ethyl acetate).

$^1\text{H NMR}$  (400 MHz,  $\text{CDCl}_3$ ,  $\delta$ ): 7.31 – 7.24 (m, 2H), 7.00 (tt,  $J = 7.3, 1.4$  Hz, 1H), 6.93 – 6.87 (m, 2H), 3.80 (s, 3H).  $^{13}\text{C NMR}$  (100 MHz,  $\text{CDCl}_3$ ,  $\delta$ ): 160.15, 129.70, 121.16, 114.48, 54.96. HRMS-EI ( $m/z$ ):  $[\text{M}]^+$  calcd for  $\text{C}_7\text{H}_8\text{O}$ , 108.0575; found, 108.0580.

### Methyl benzoate (3q)

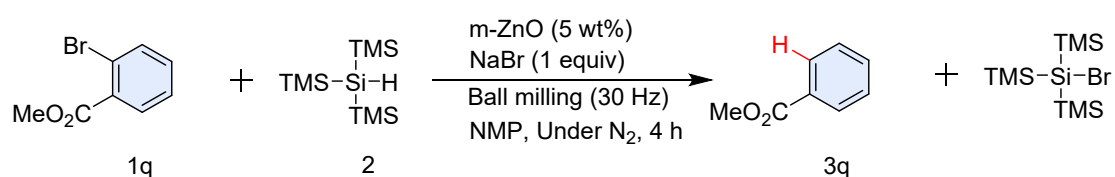

According to general procedure B, methyl 2-bromobenzoate (57.3  $\mu$ L, 0.4 mmol) afforded

methyl benzoate in 70% yield (35.3  $\mu$ L, 0.28 mmol) as colorless transparent liquid by flash column chromatography (hexane/ethyl acetate).

$^1\text{H}$  NMR (400 MHz,  $\text{CDCl}_3$ ,  $\delta$ ): 8.06 – 7.99 (m, 2H), 7.58 – 7.51 (m, 1H), 7.48 – 7.41 (m, 2H), 3.87 (s, 3H).  $^{13}\text{C}$  NMR (100 MHz,  $\text{CDCl}_3$ ,  $\delta$ ): 167.08, 133.40, 130.50, 129.92, 128.67, 52.10. HRMS-EI ( $m/z$ ):  $[\text{M}]^+$  calcd for  $\text{C}_8\text{H}_8\text{O}_2$ , 136.0524; found, 136.0527.

### Acetophenone (3r)

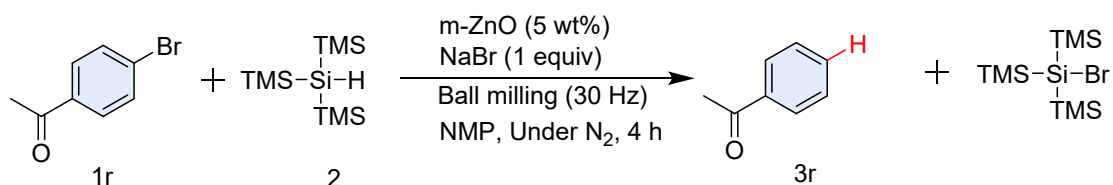

According to general procedure B, 4-bromoacetophenone (48.5  $\mu$ L, 0.4 mmol) afforded methyl benzoate in 51% yield (24.5  $\mu$ L, 0.20 mmol) as slightly yellowish transparent liquid by flash column chromatography (hexane/ethyl acetate).

$^1\text{H}$  NMR (400 MHz,  $\text{CDCl}_3$ ,  $\delta$ ): 7.96 – 7.90 (m, 2H), 7.60 – 7.53 (m, 1H), 7.50 – 7.43 (m, 2H), 2.58 (s, 3H).  $^{13}\text{C}$  NMR (100 MHz,  $\text{CDCl}_3$ ,  $\delta$ ): 198.00, 136.63, 134.45, 129.07, 128.83, 26.36. HRMS-EI ( $m/z$ ):  $[\text{M}]^+$  calcd for  $\text{C}_8\text{H}_8\text{O}$ , 120.0575; found, 120.0574.

### Phenyl acetate (3s)

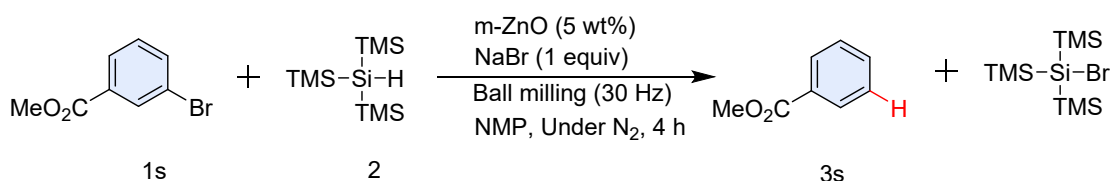

According to general procedure B, 3-bromophenyl acetate (86.1 mg, 0.4 mmol) afforded phenyl acetate in 74% yield (41.3  $\mu$ L, 0.30 mmol) as slightly brown transparent liquid by flash column chromatography (hexane/ethyl acetate).

$^1\text{H}$  NMR (400 MHz,  $\text{CDCl}_3$ ,  $\delta$ ): 7.64 (tt,  $J = 7.4, 1.4$  Hz, 1H), 7.42 – 7.35 (m, 2H), 7.12 – 7.05 (m, 2H), 2.28 (s, 3H).  $^{13}\text{C}$  NMR (400 MHz,  $\text{CDCl}_3$ ,  $\delta$ ): 169.48, 151.25, 129.88, 125.07, 121.99, 21.08. HRMS-EI ( $m/z$ ):  $[\text{M}]^+$  calcd for  $\text{C}_8\text{H}_8\text{O}_2$ , 136.0524; found, 136.0528.

### Phenyl acetate (3t)

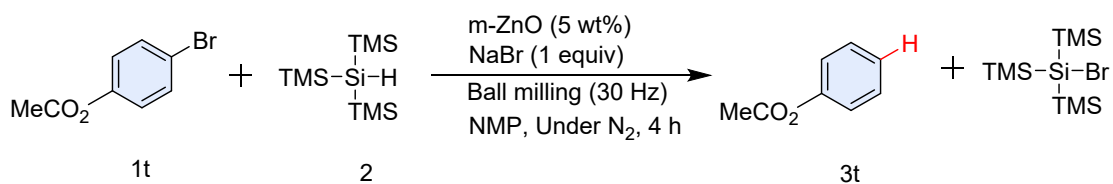

According to general procedure B, 4-bromophenyl acetate (57.3  $\mu$ L, 0.4 mmol) afforded phenyl acetate in 50% yield (27.3  $\mu$ L, 0.20 mmol) as slightly brown transparent liquid by flash column chromatography (hexane/ethyl acetate).

$^1\text{H}$  NMR (400 MHz,  $\text{CDCl}_3$ ,  $\delta$ ): 7.64 (tt,  $J = 7.4, 1.4$  Hz, 1H), 7.42 – 7.35 (m, 2H), 7.12 – 7.05 (m, 2H), 2.28 (s, 3H).  $^{13}\text{C}$  NMR (100 MHz,  $\text{CDCl}_3$ ,  $\delta$ ): 169.48, 151.25, 129.88, 125.07, 121.99, 21.08. HRMS-EI ( $m/z$ ):  $[\text{M}]^+$  calcd for  $\text{C}_8\text{H}_8\text{O}_2$ , 136.0524; found, 136.0528.

## **18.NMR Spectra of hydrodebromination products**

**<sup>1</sup>H-NMR**

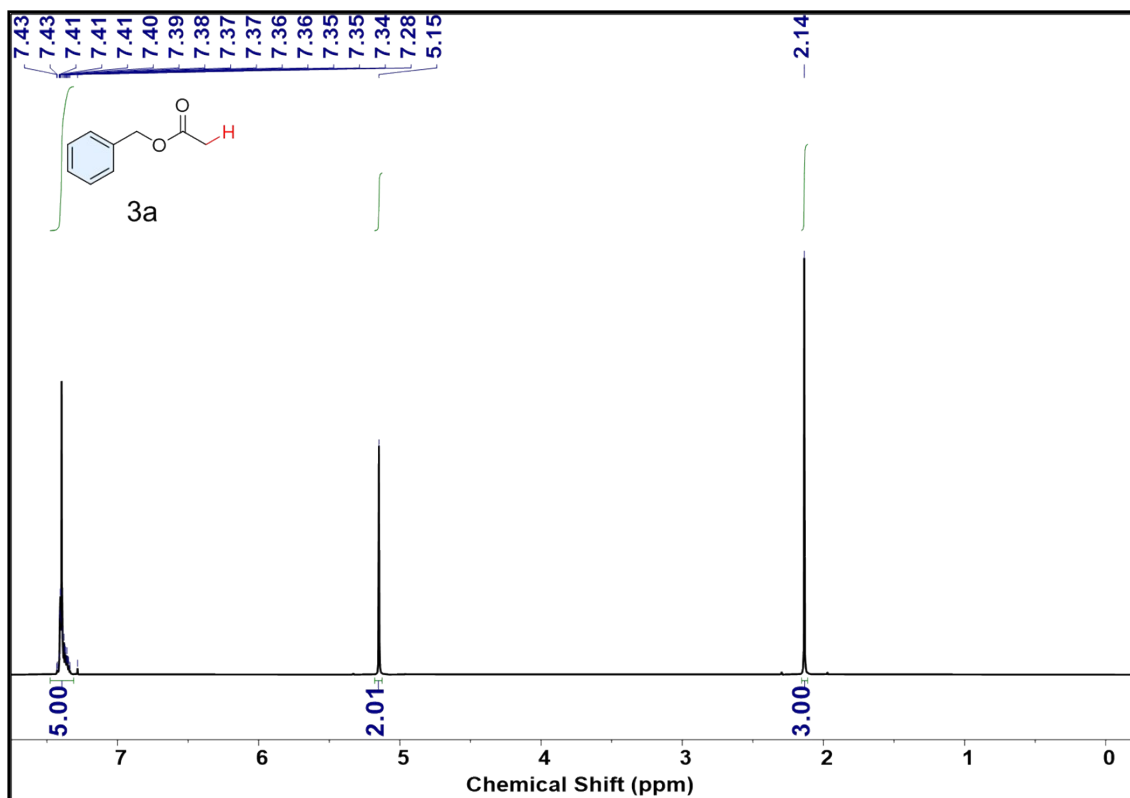

**<sup>13</sup>C-NMR**

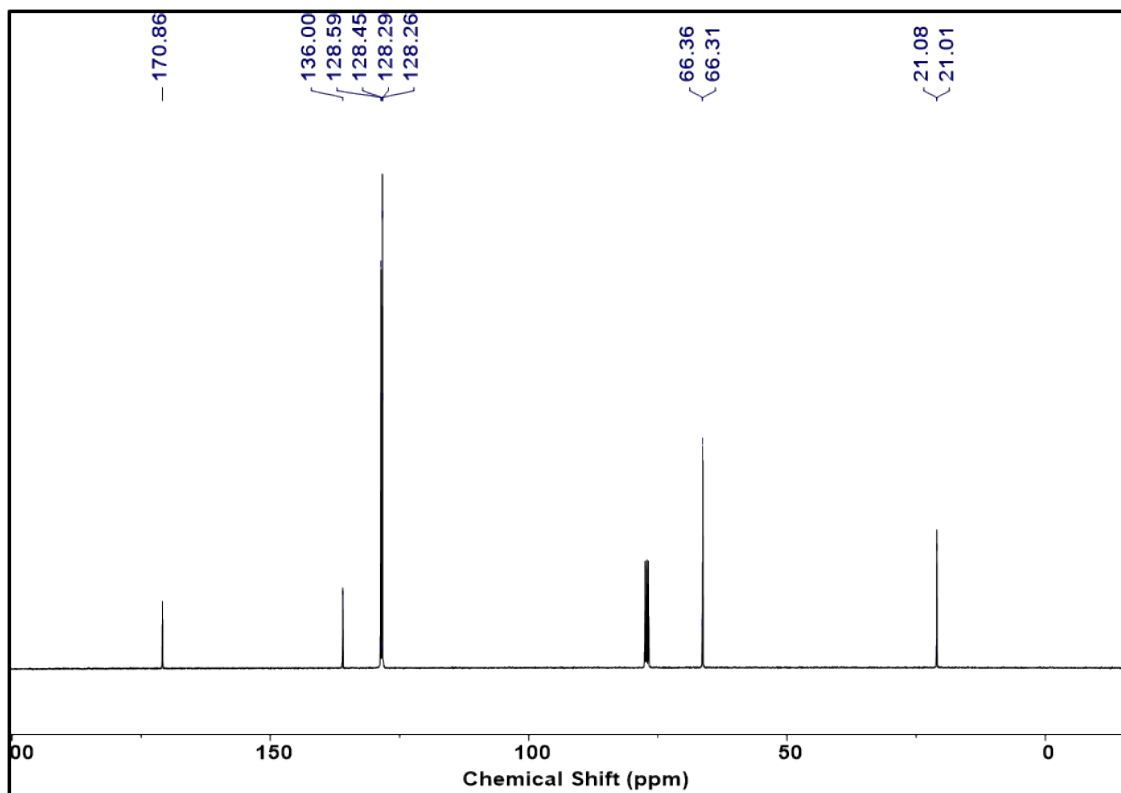

**<sup>1</sup>H-NMR**

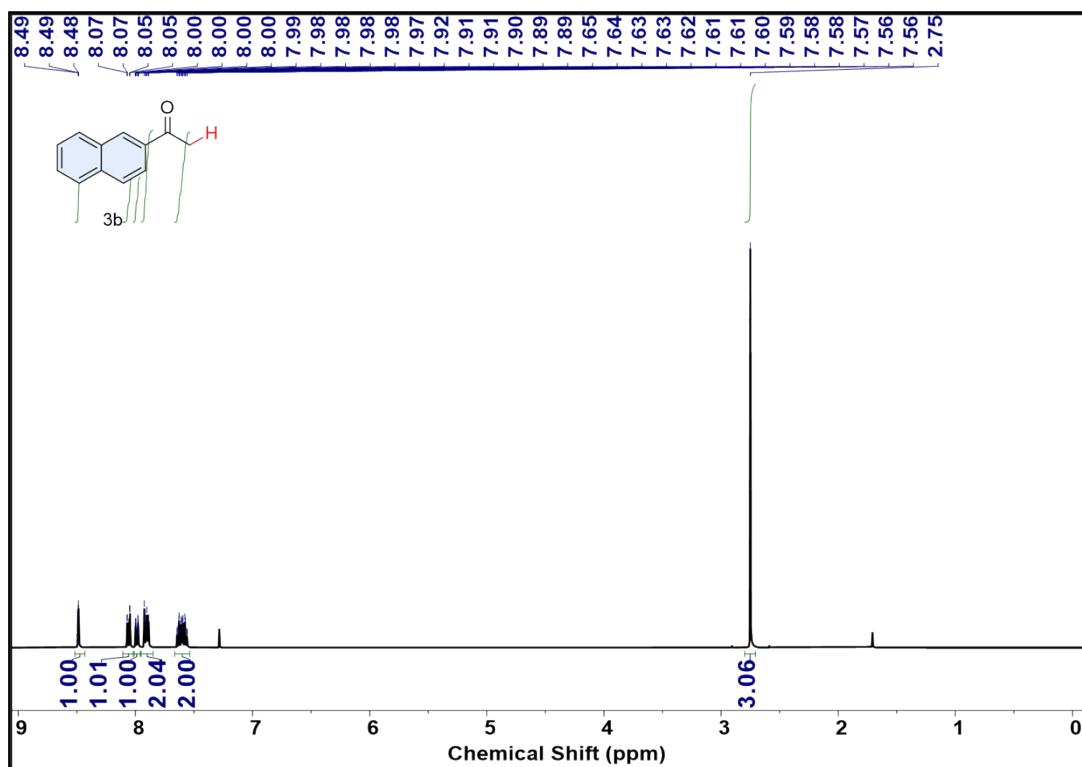

<sup>13</sup>C-NMR

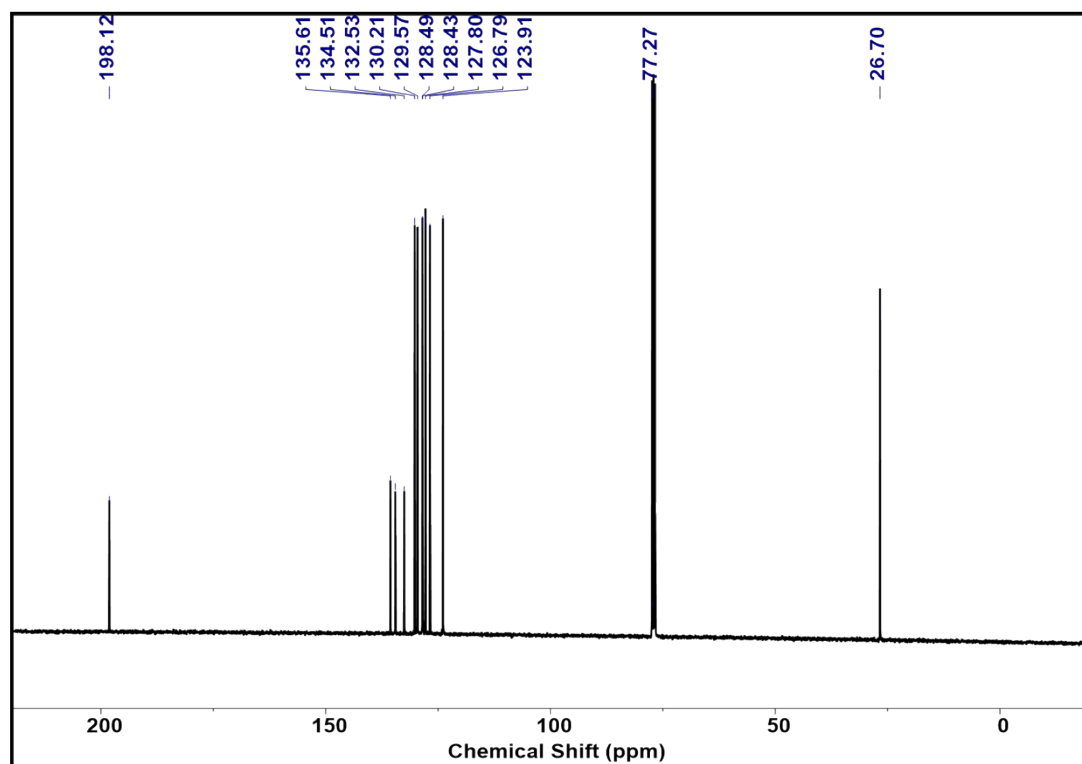

<sup>1</sup>H-NMR

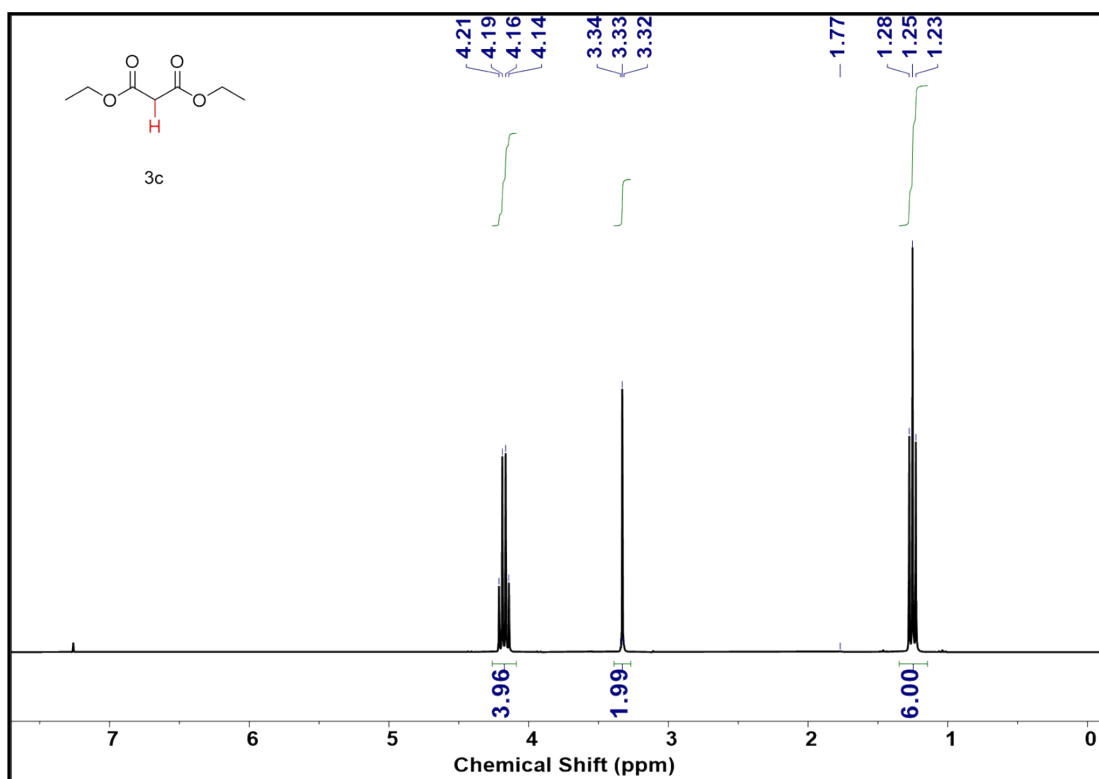

**<sup>13</sup>C-NMR**

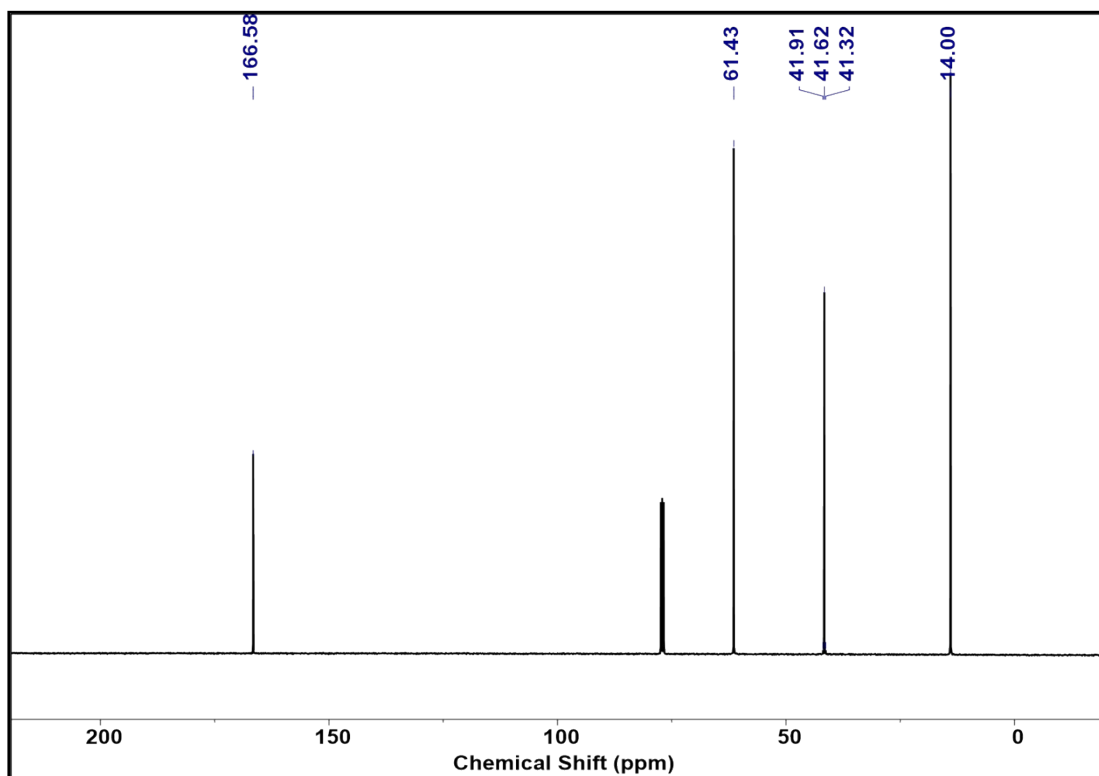

**<sup>1</sup>H-NMR**

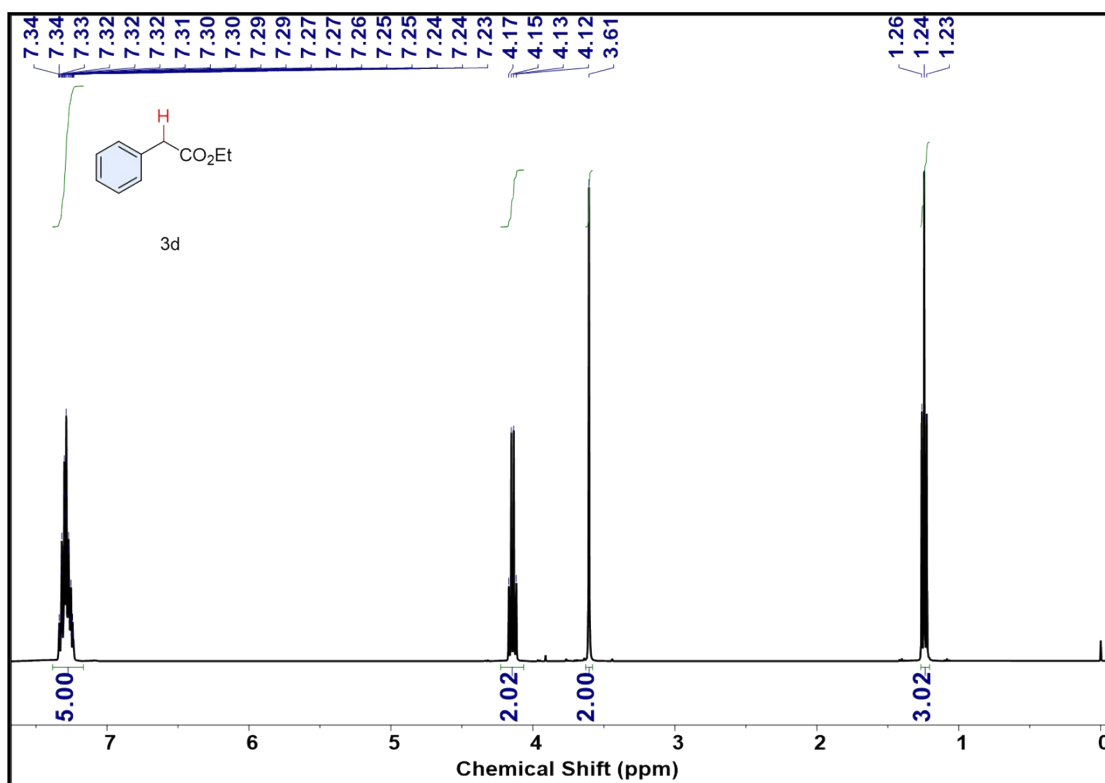

<sup>13</sup>C-NMR

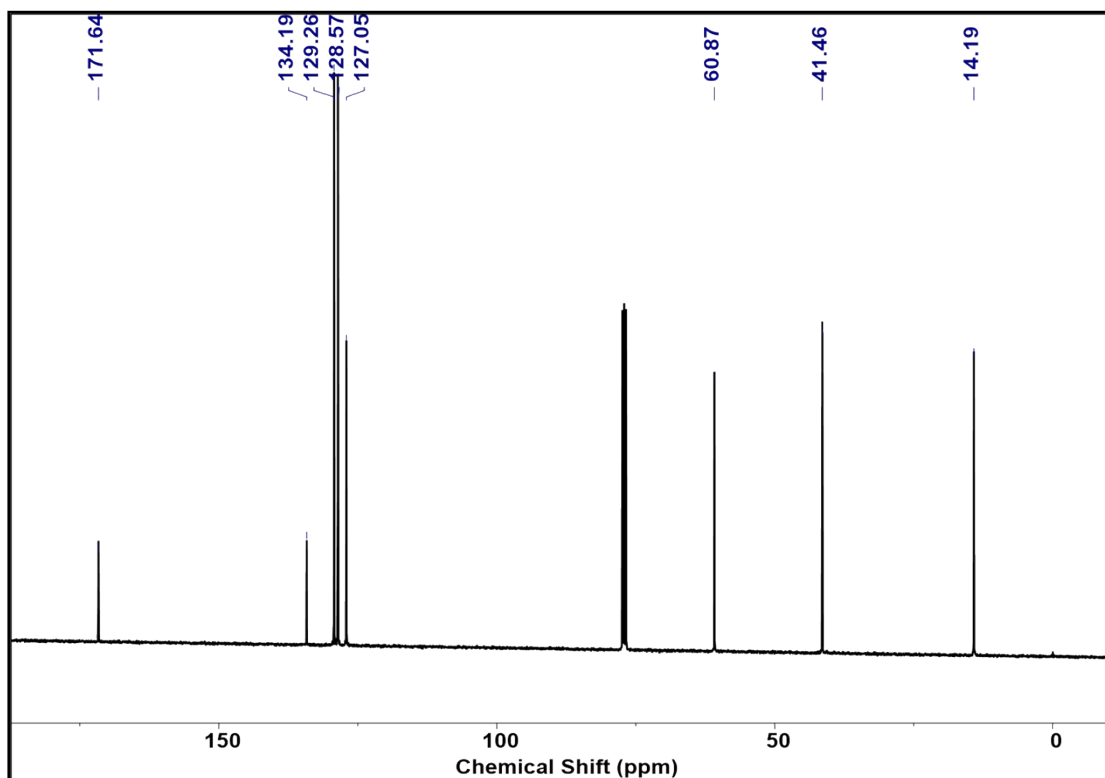

<sup>1</sup>H-NMR

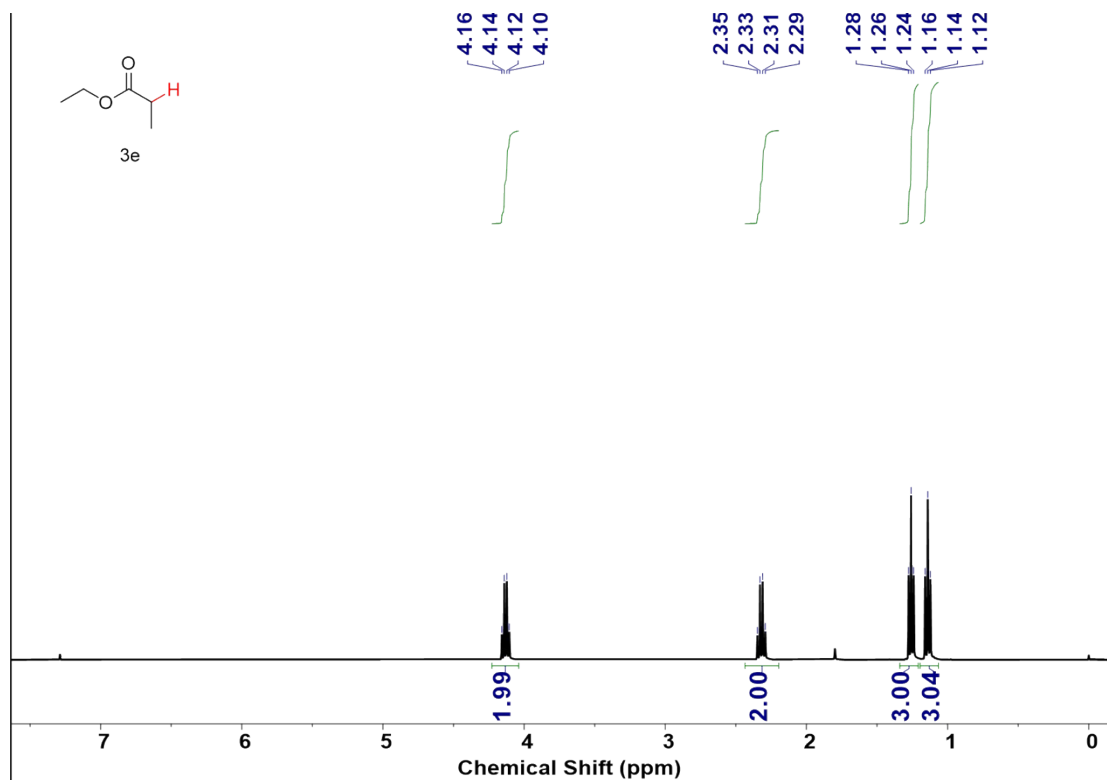

<sup>13</sup>C-NMR

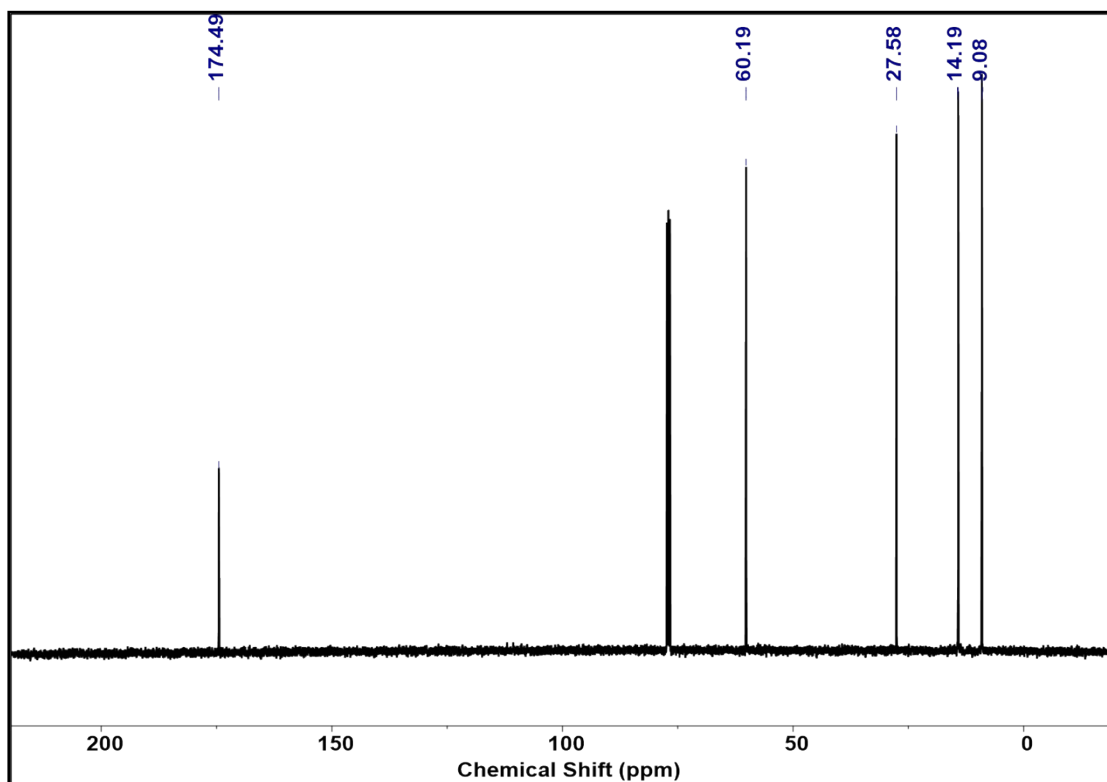

<sup>1</sup>H-NMR



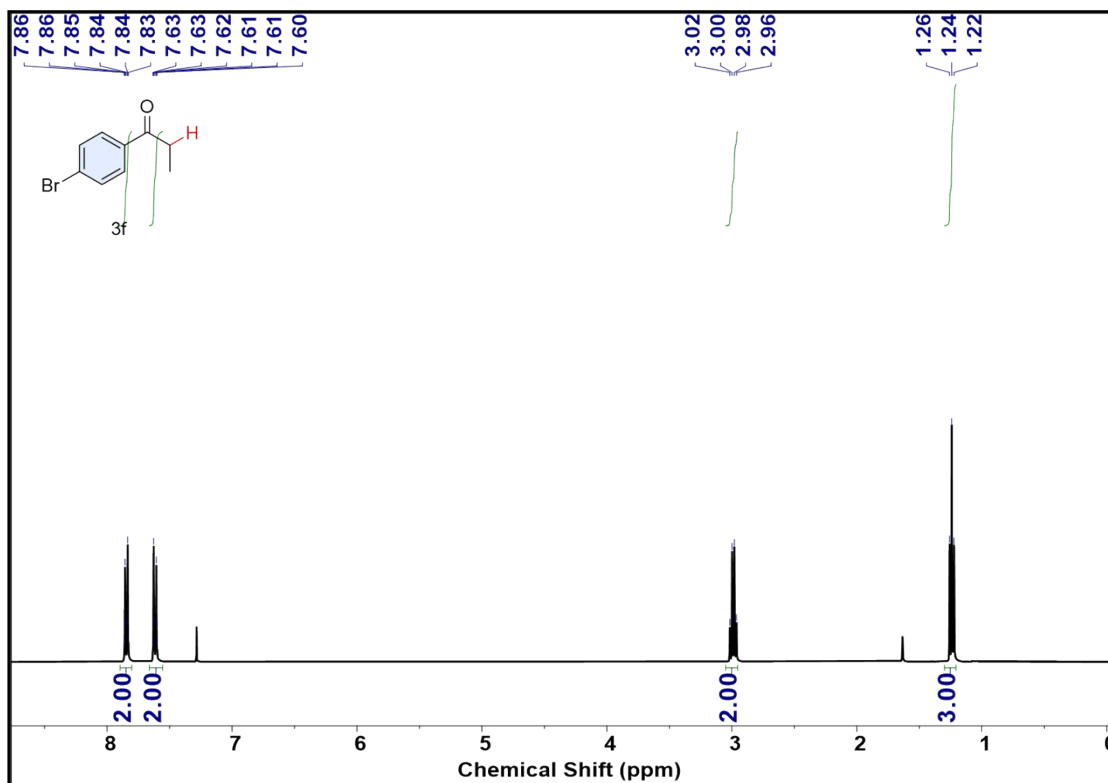

**<sup>13</sup>C-NMR**

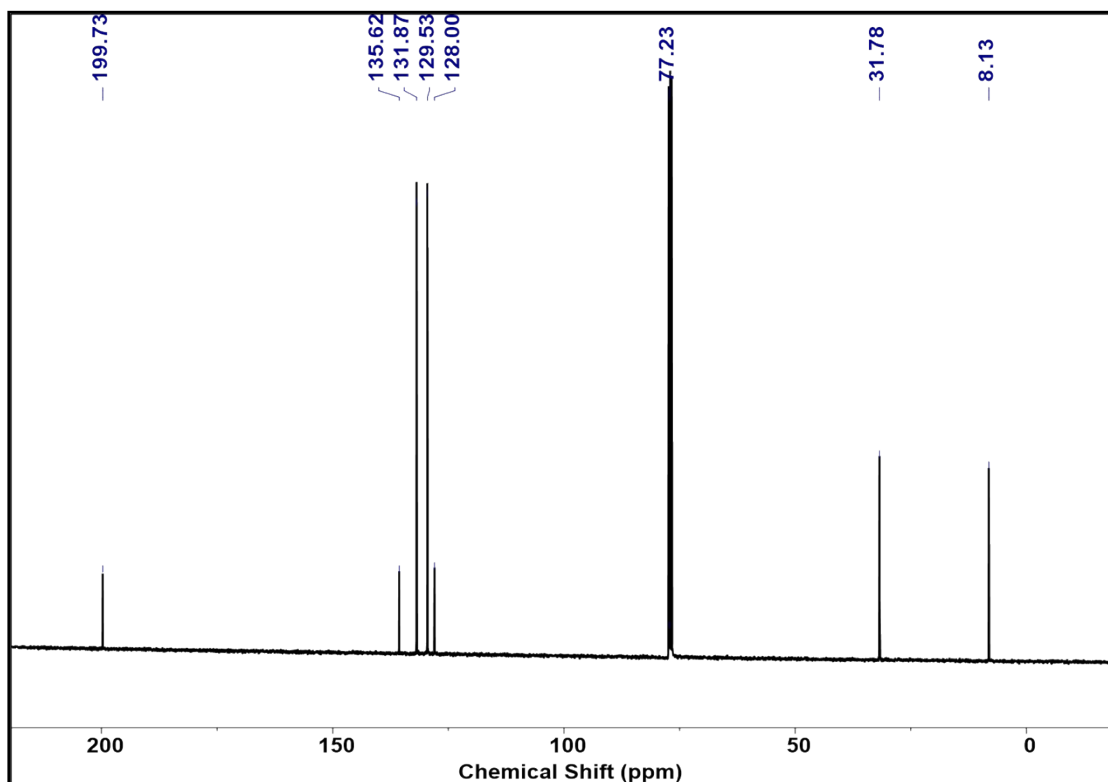

**<sup>1</sup>H-NMR**

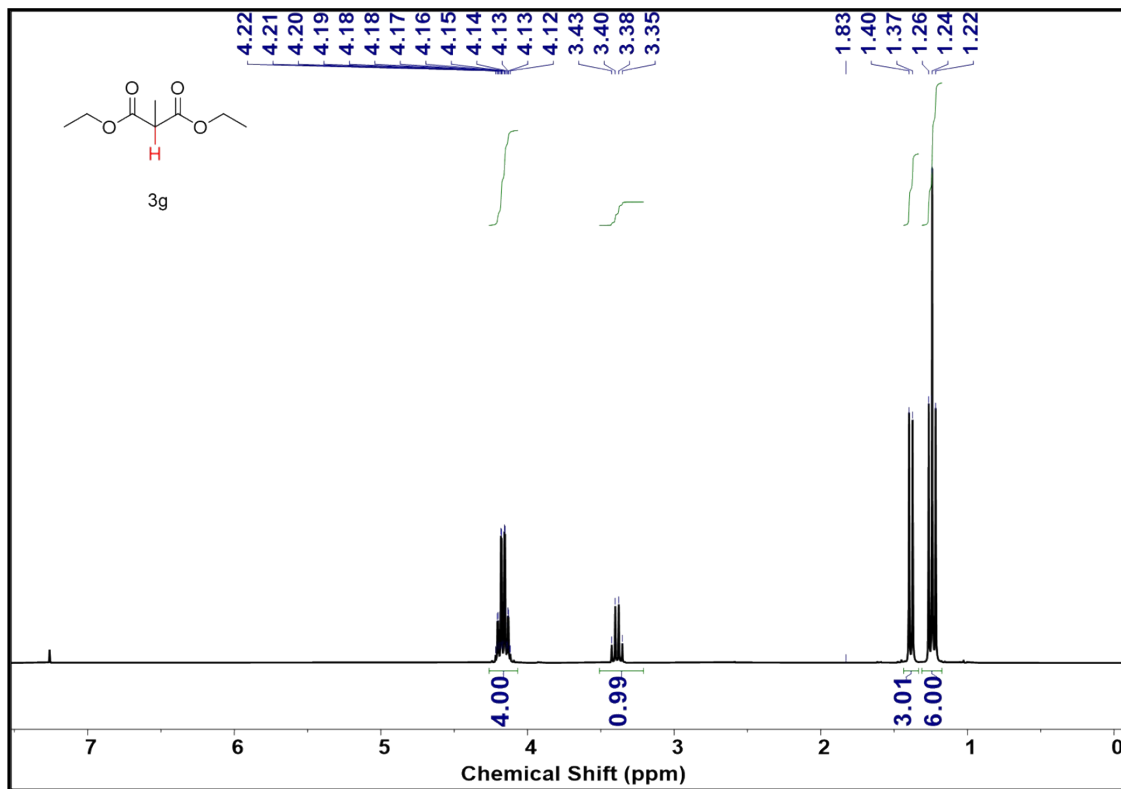

<sup>13</sup>C-NMR

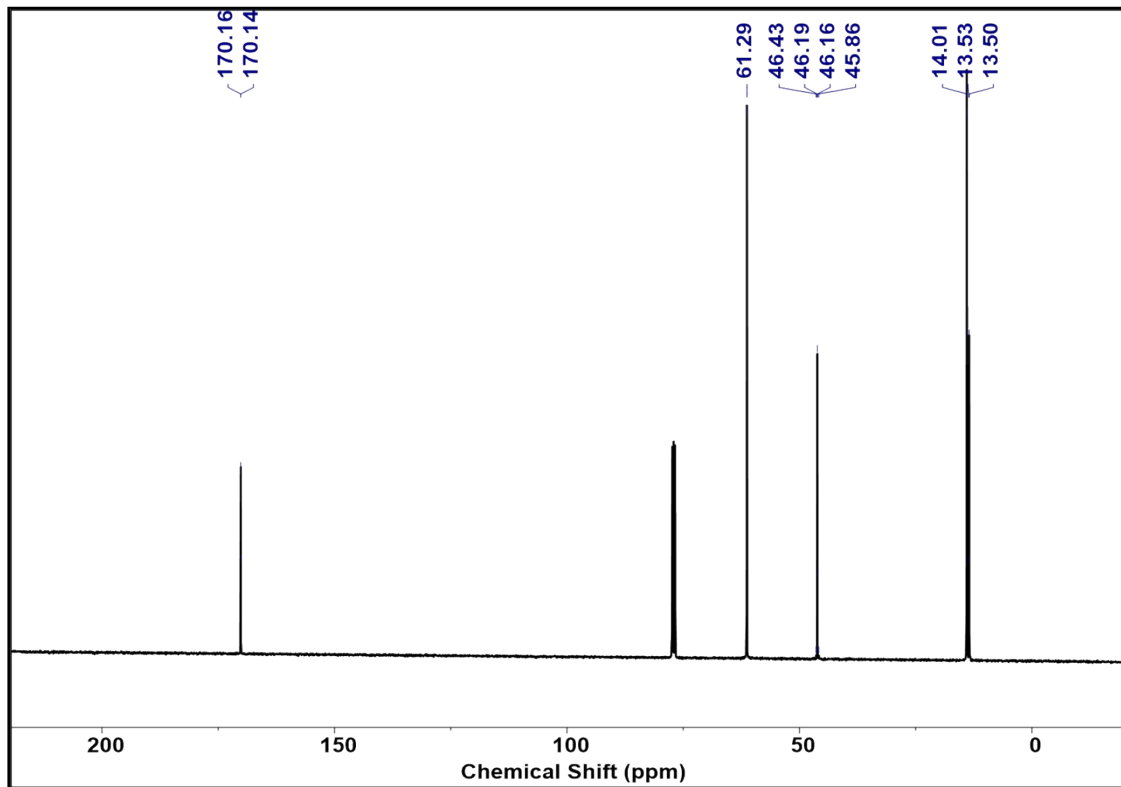

<sup>1</sup>H-NMR

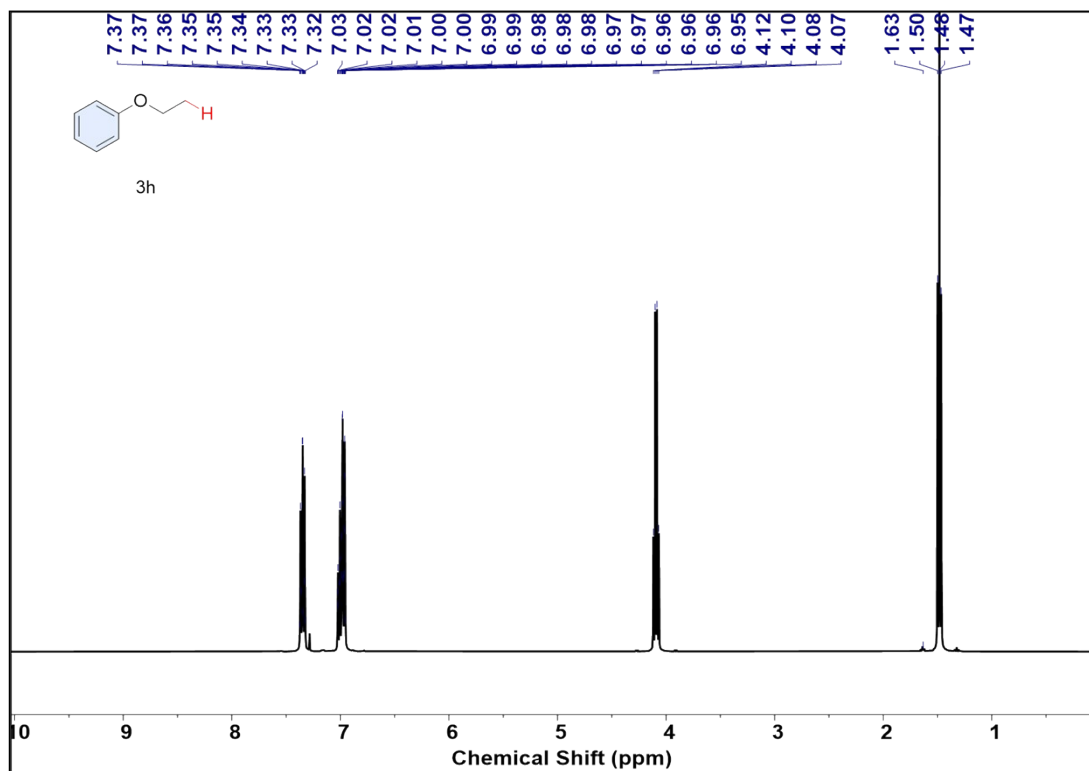

<sup>13</sup>C-NMR

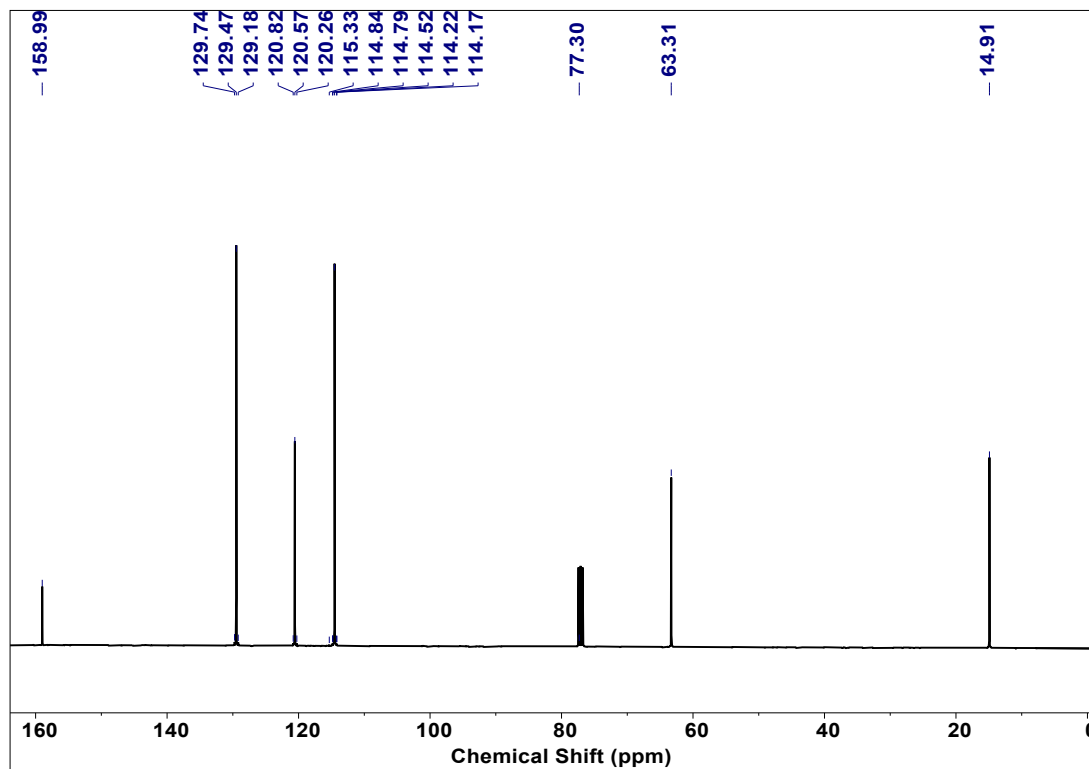

<sup>1</sup>H-NMR

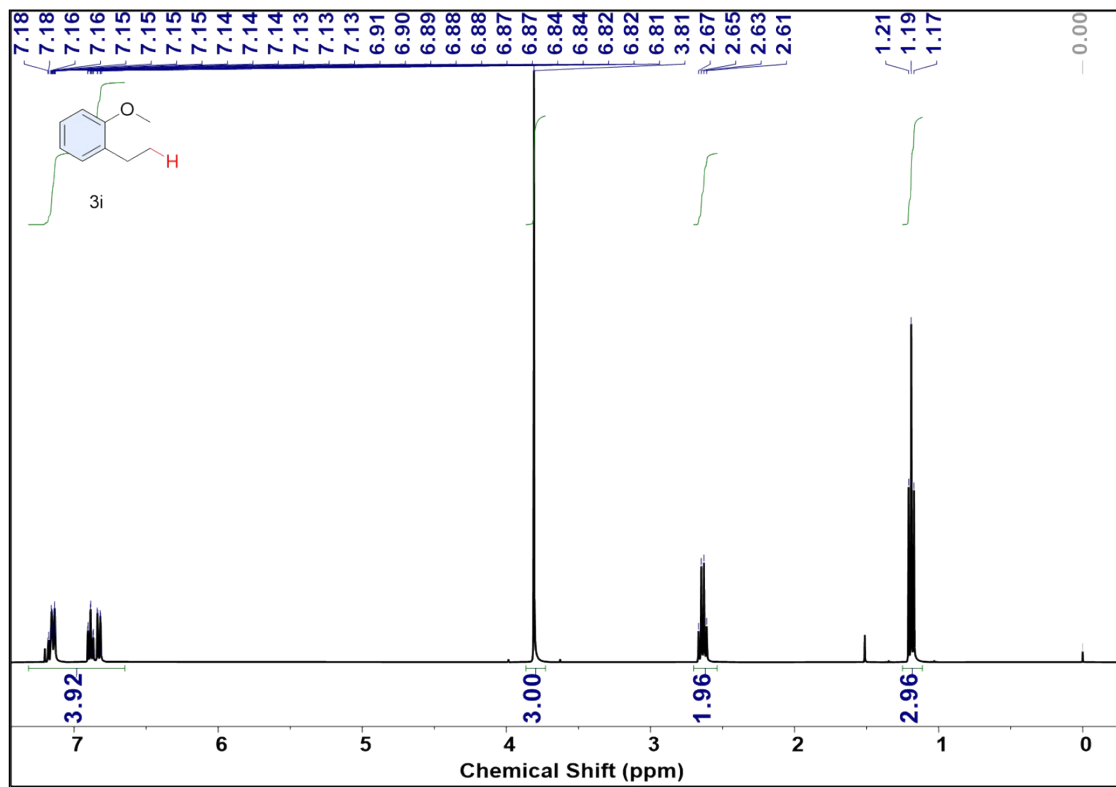

**<sup>13</sup>C-NMR**

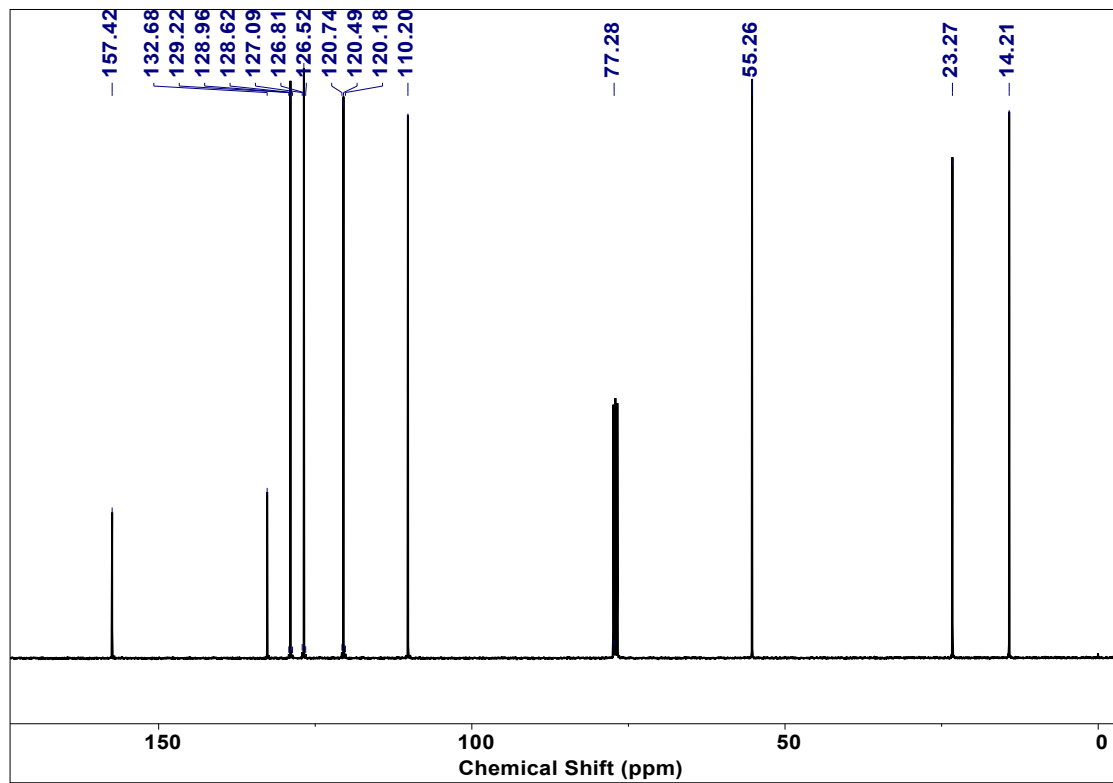

**<sup>1</sup>H-NMR**

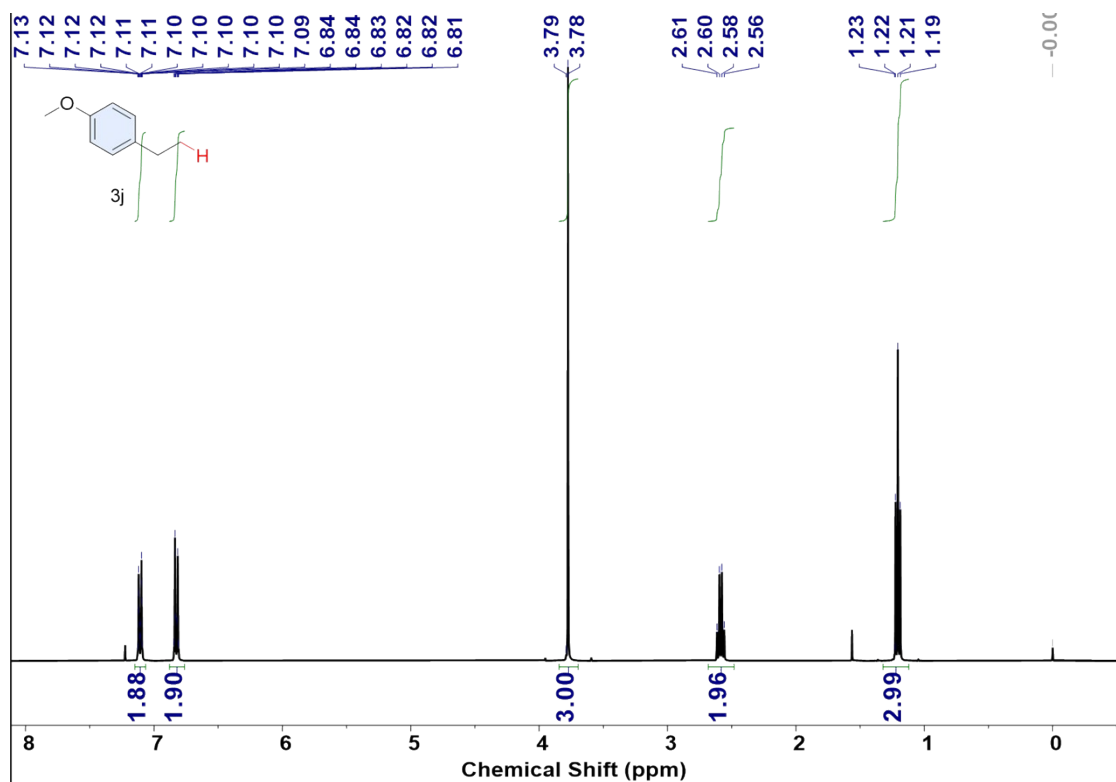

**<sup>13</sup>C-NMR**

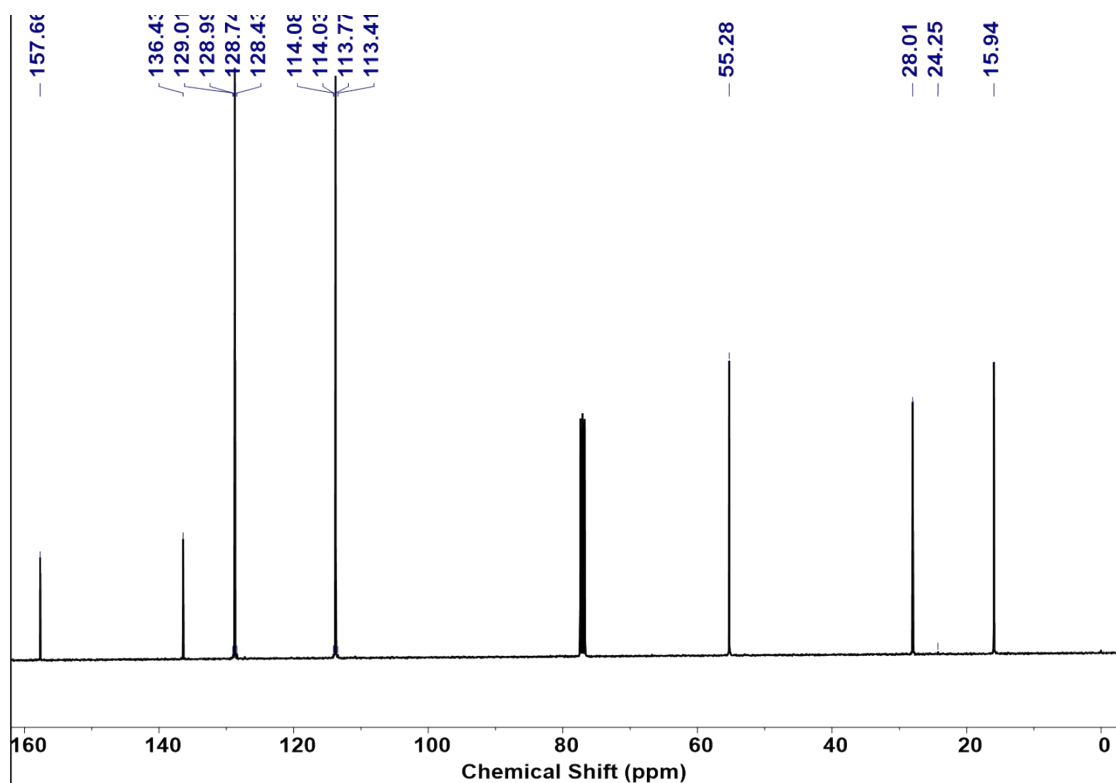

**<sup>1</sup>H-NMR**

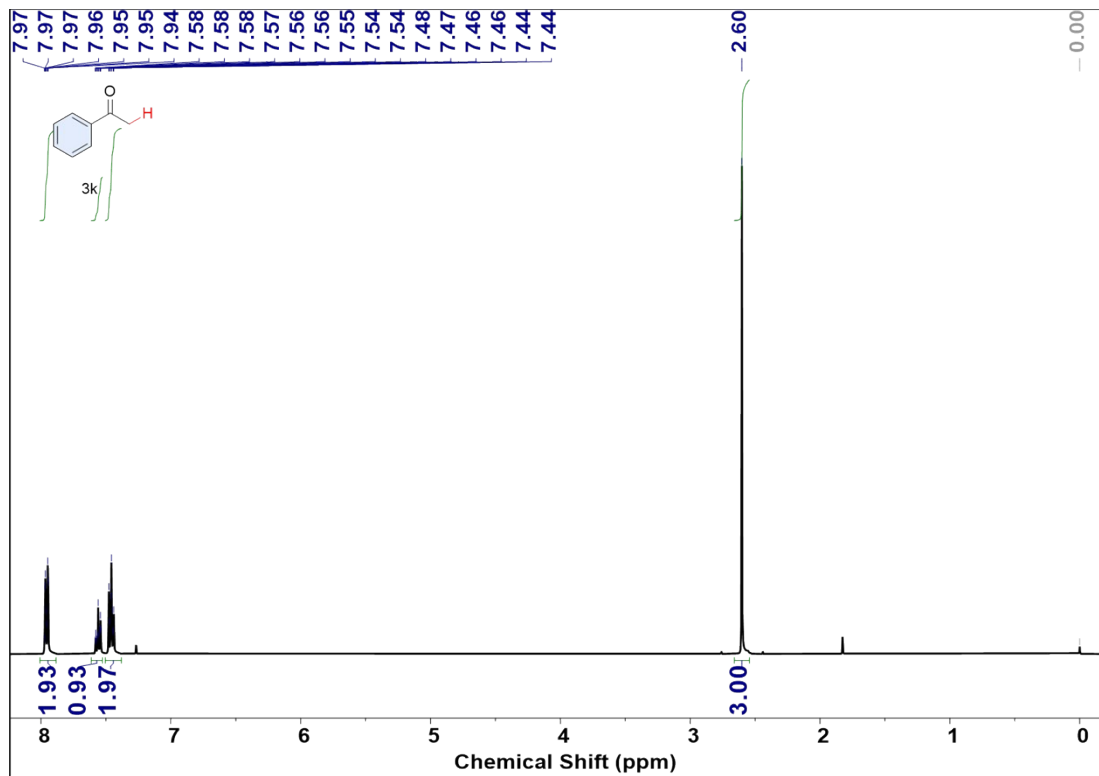

**<sup>13</sup>C-NMR**

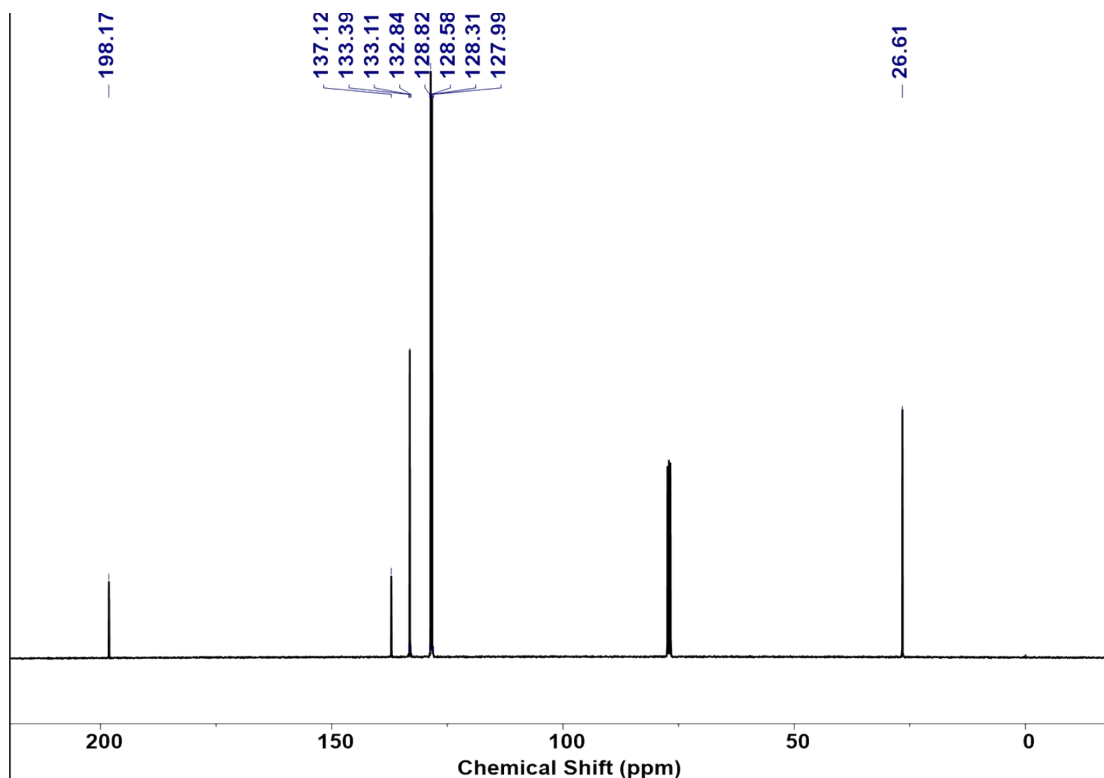

**<sup>1</sup>H-NMR**

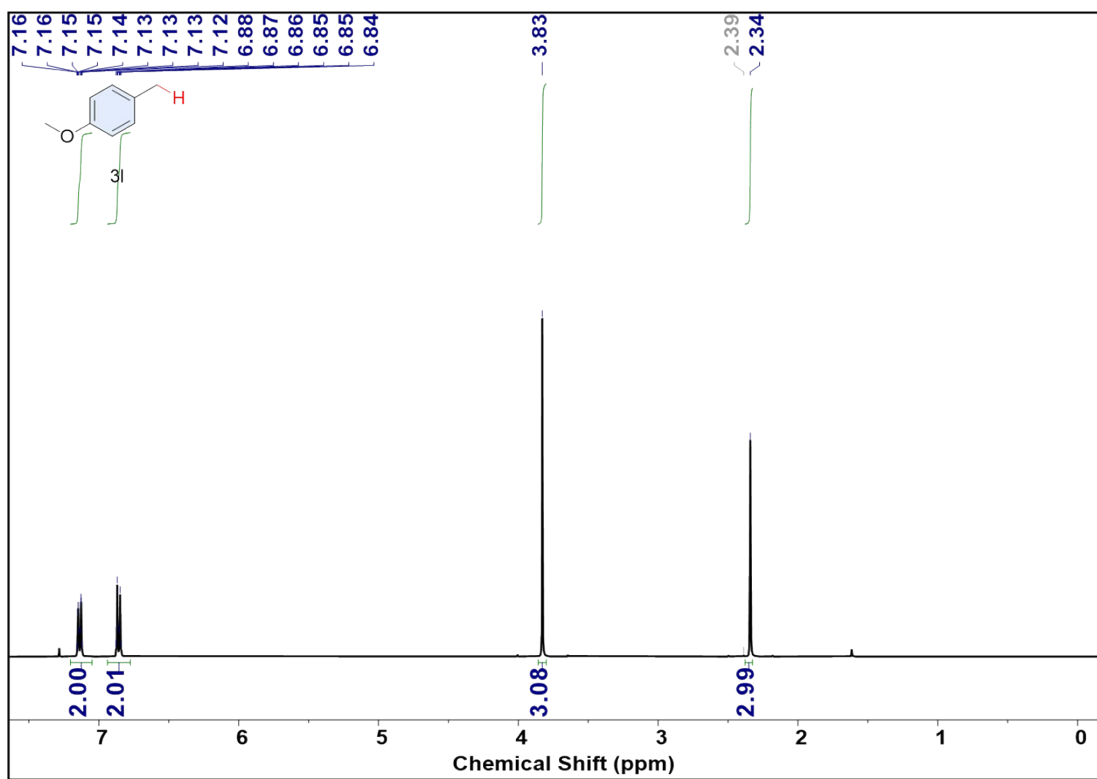

**<sup>13</sup>C-NMR**

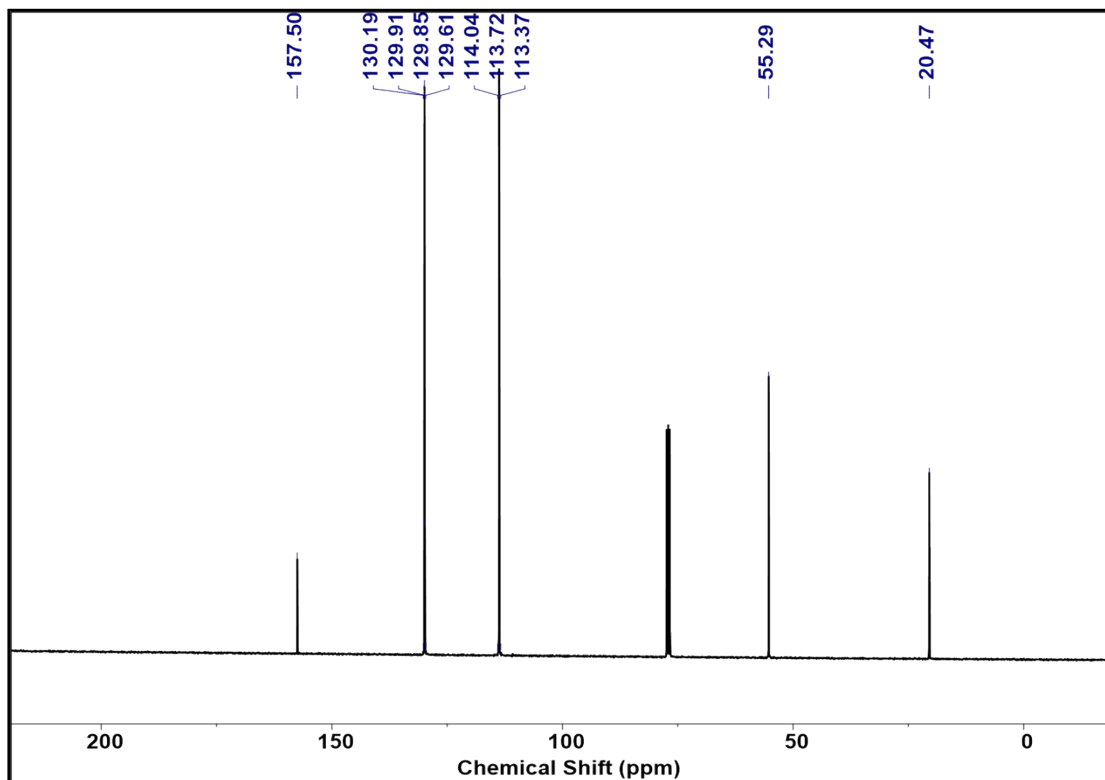

**<sup>1</sup>H-NMR**

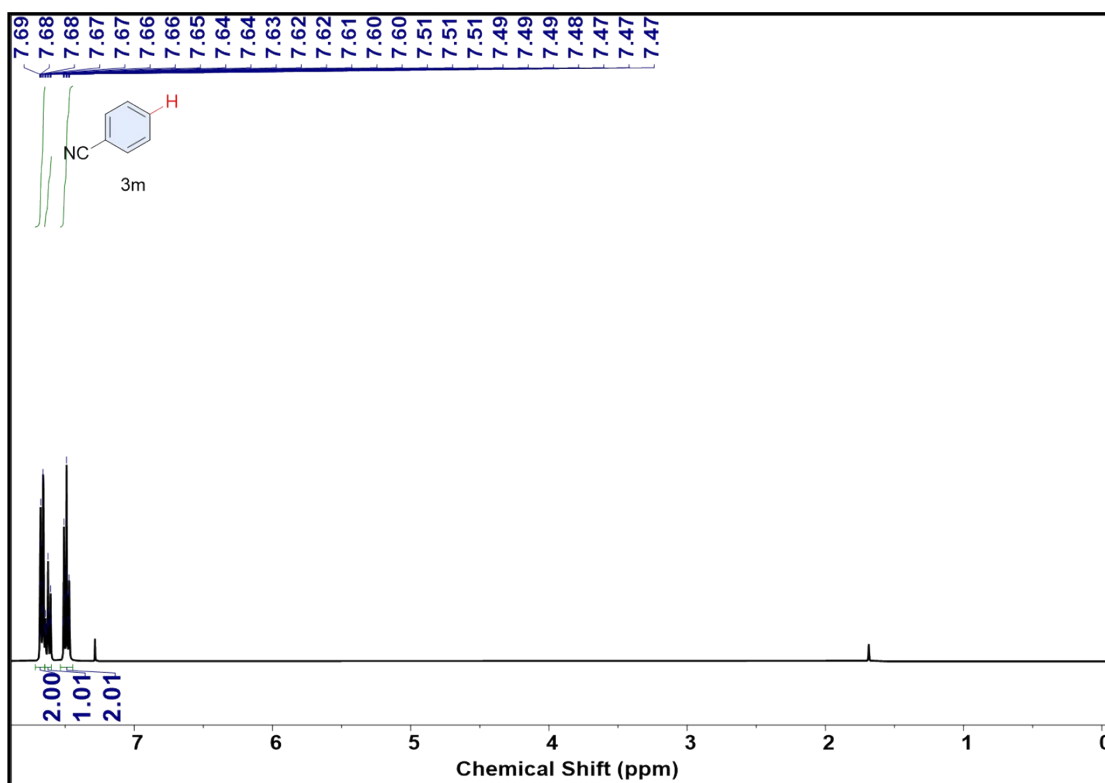

**<sup>13</sup>C-NMR**

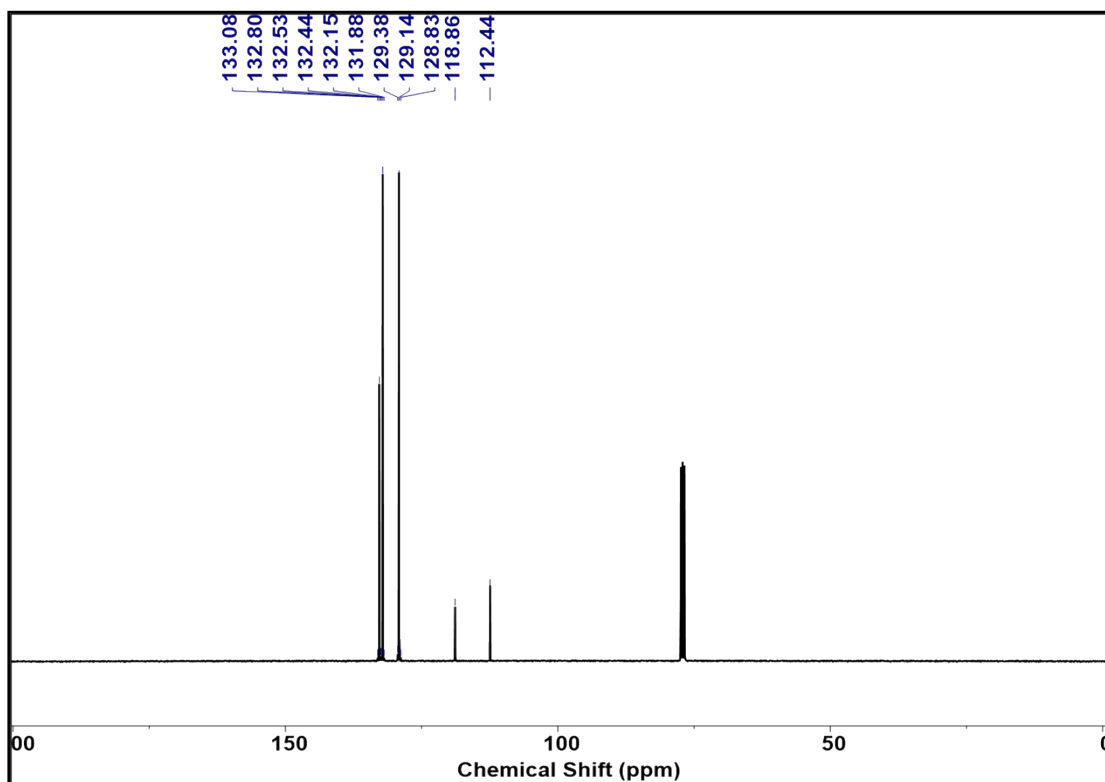

**<sup>1</sup>H-NMR**



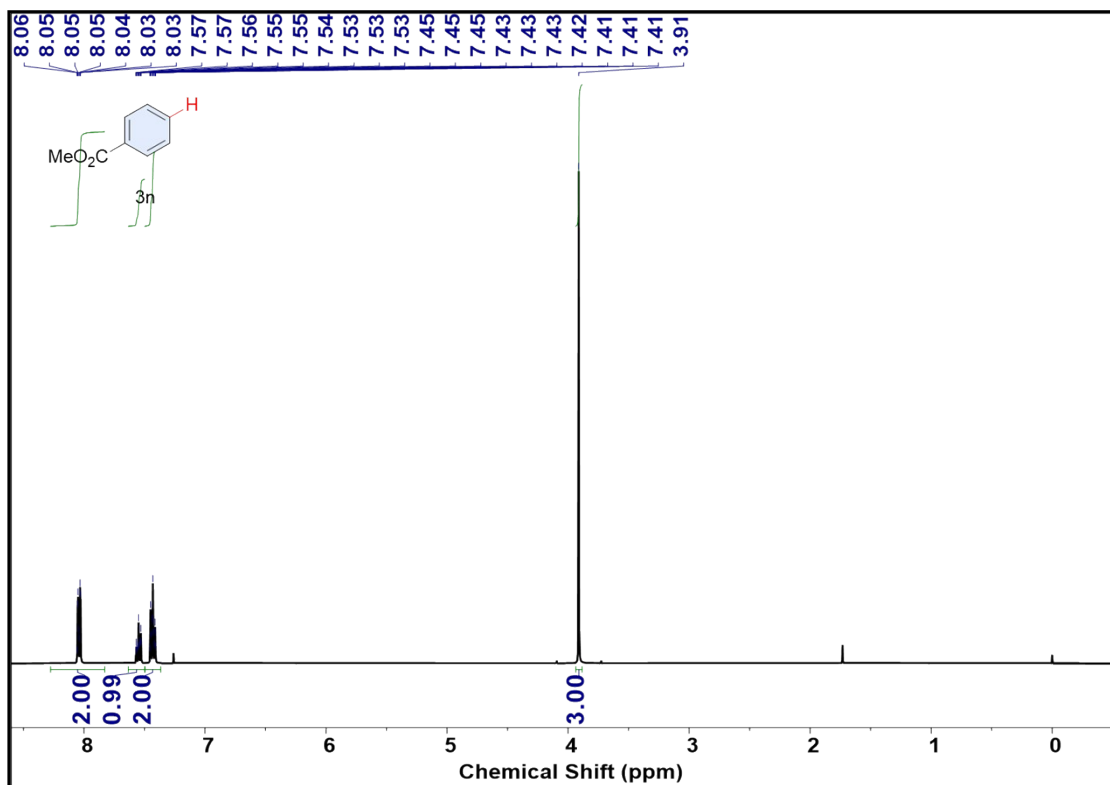

**<sup>13</sup>C-NMR**

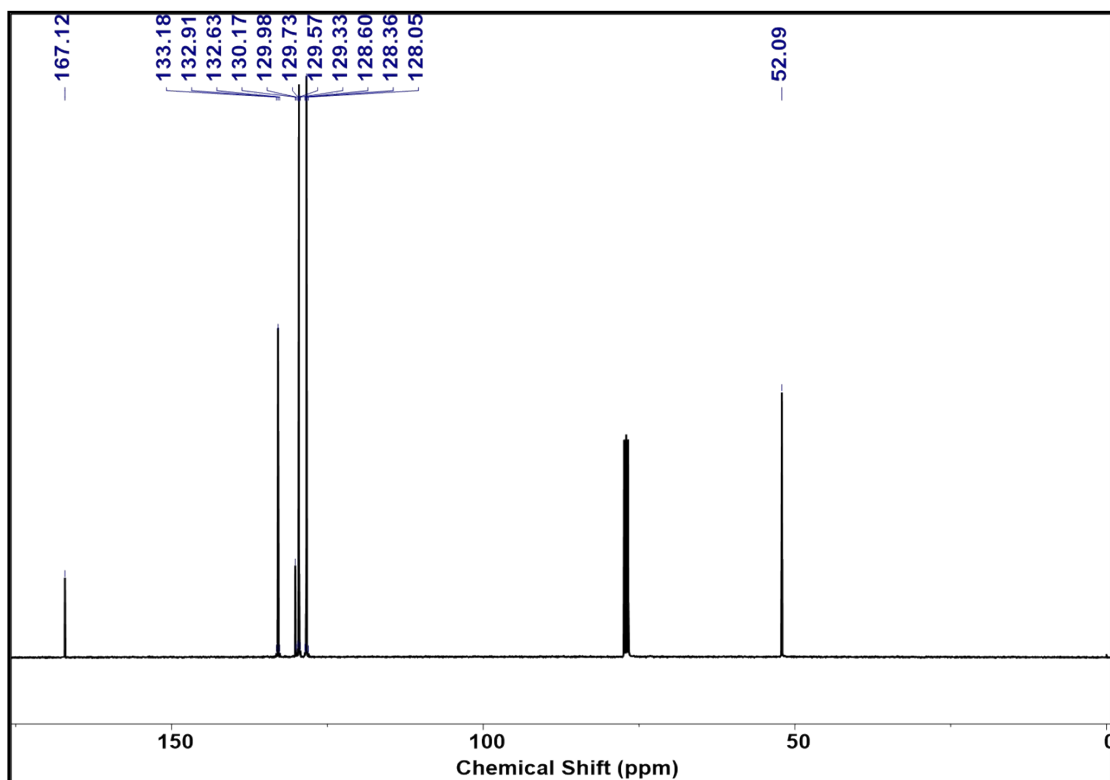

**<sup>1</sup>H-NMR**

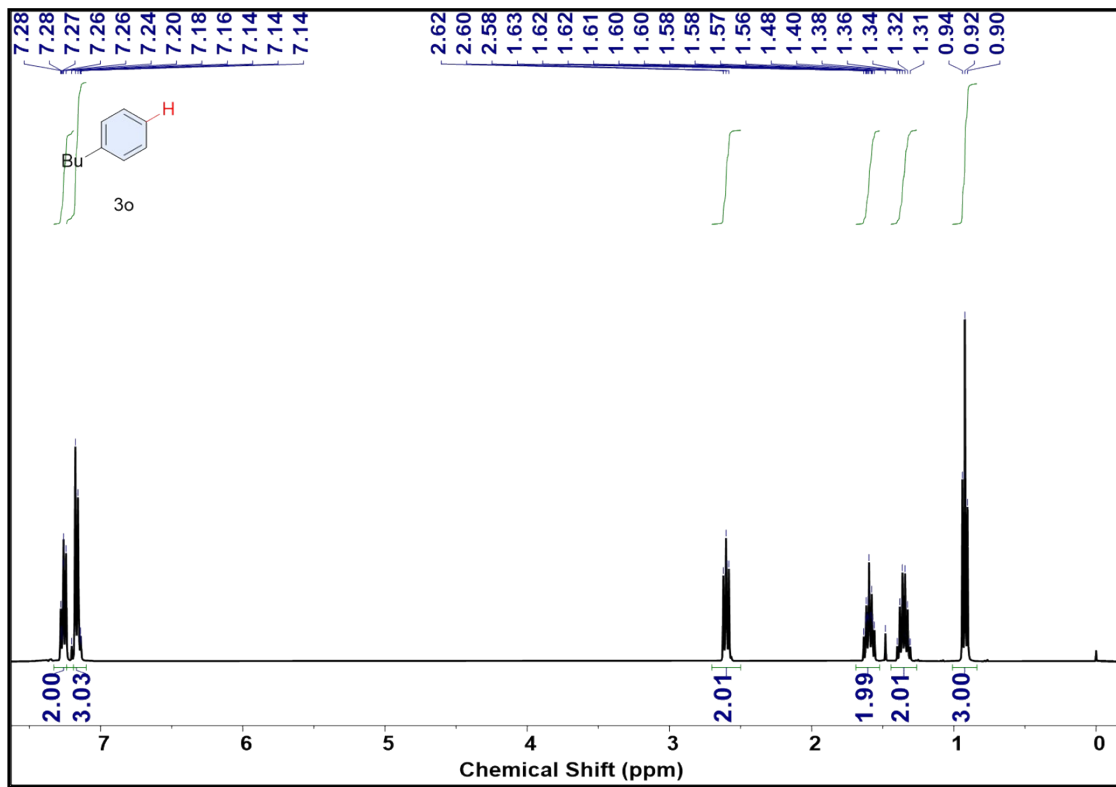

**<sup>13</sup>C-NMR**

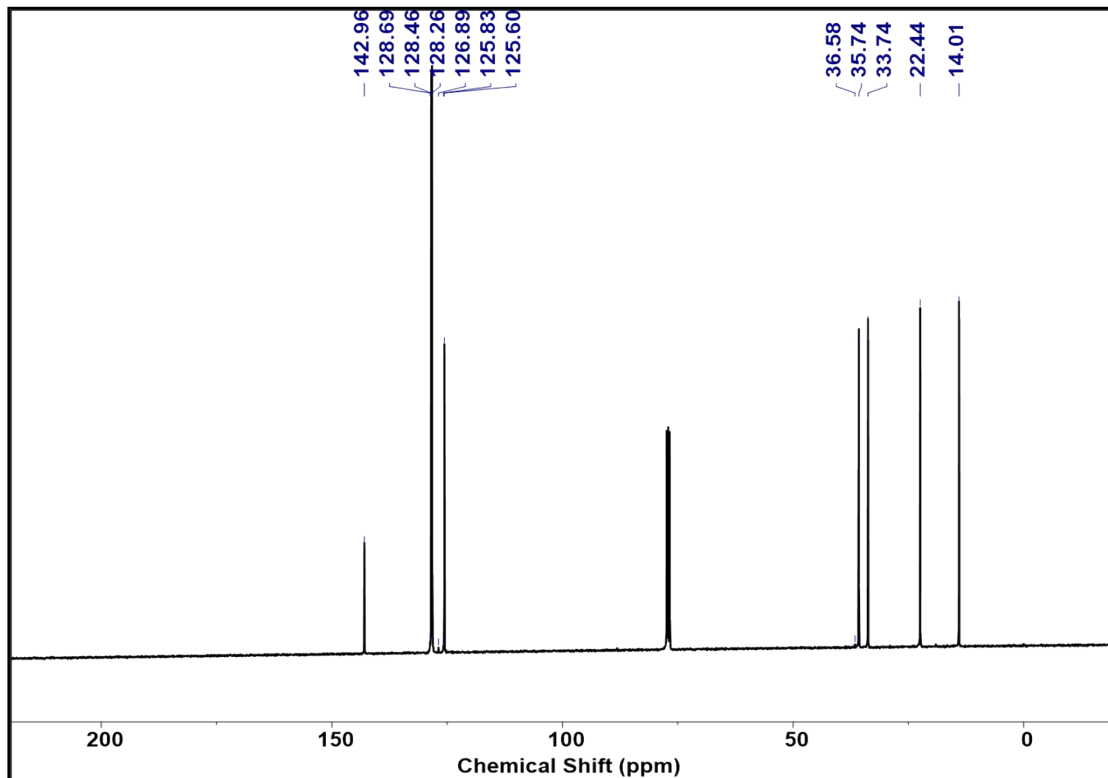

**<sup>1</sup>H-NMR**

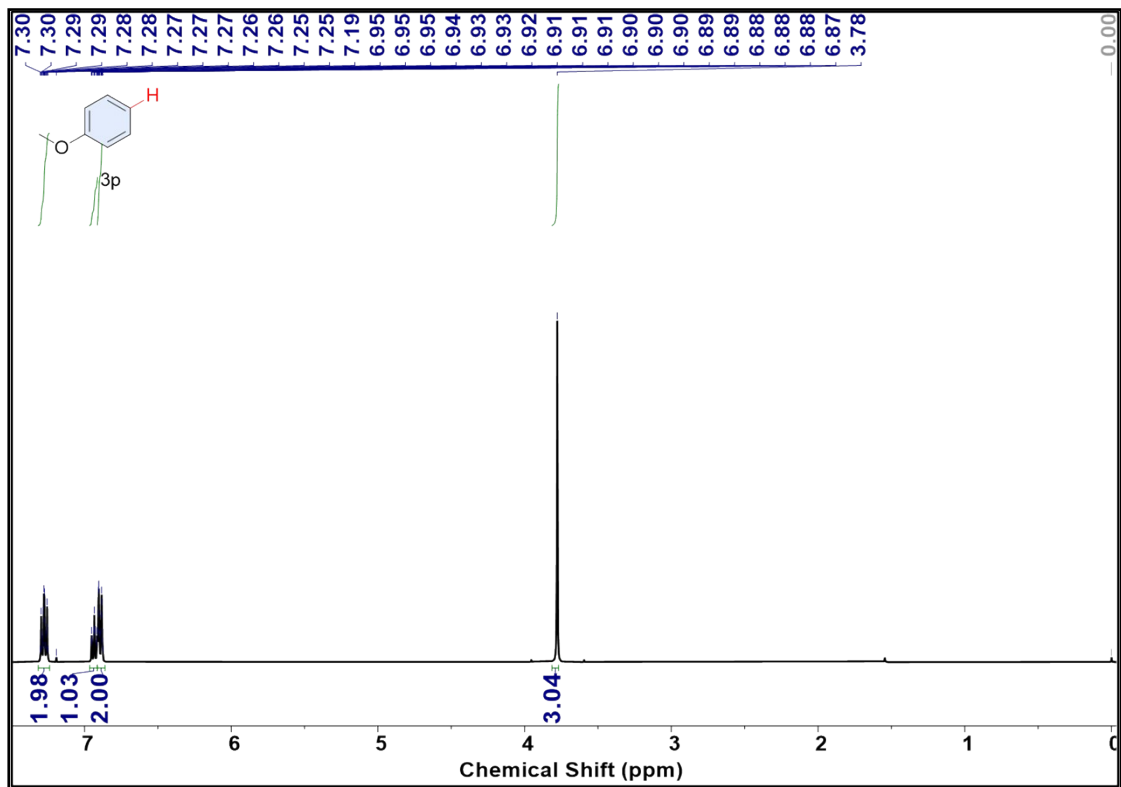

**<sup>13</sup>C-NMR**

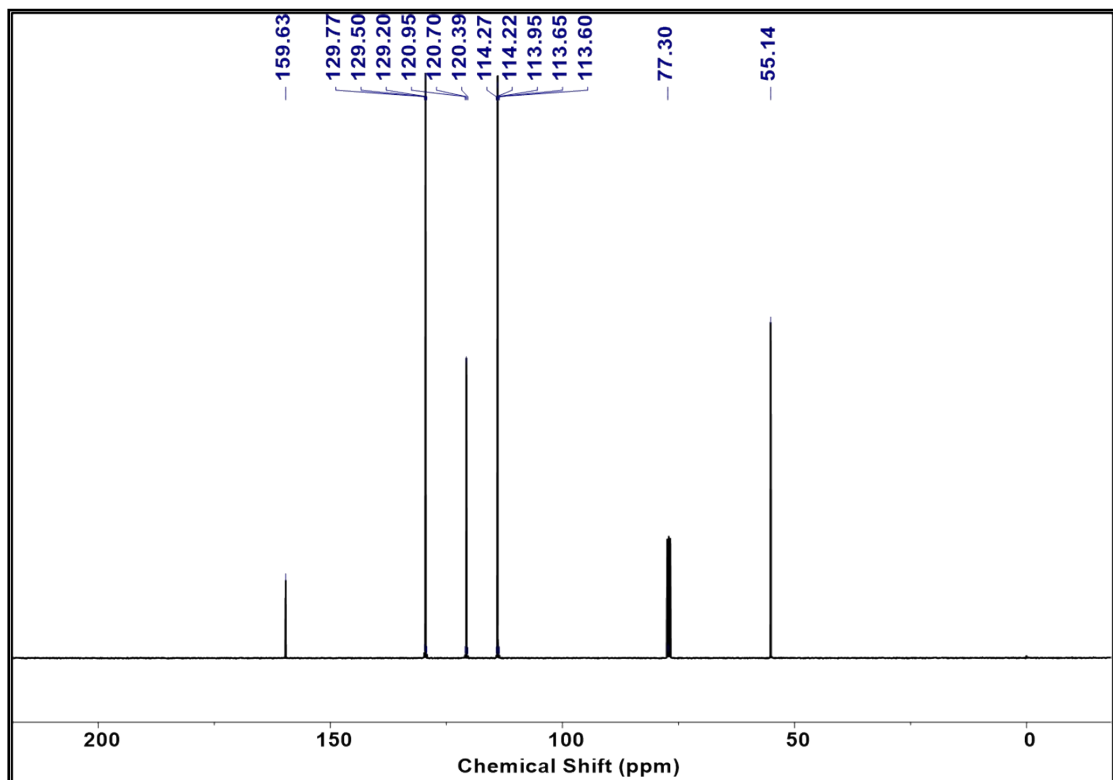

**<sup>1</sup>H-NMR**

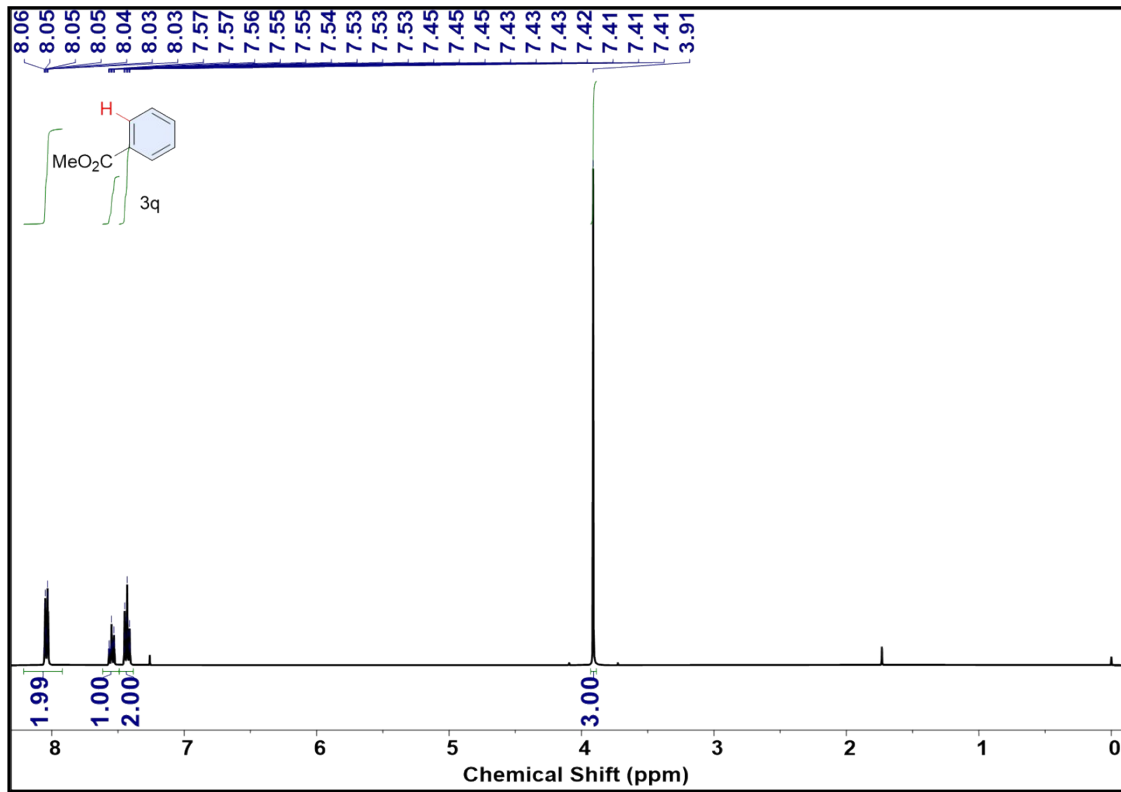

<sup>13</sup>C-NMR

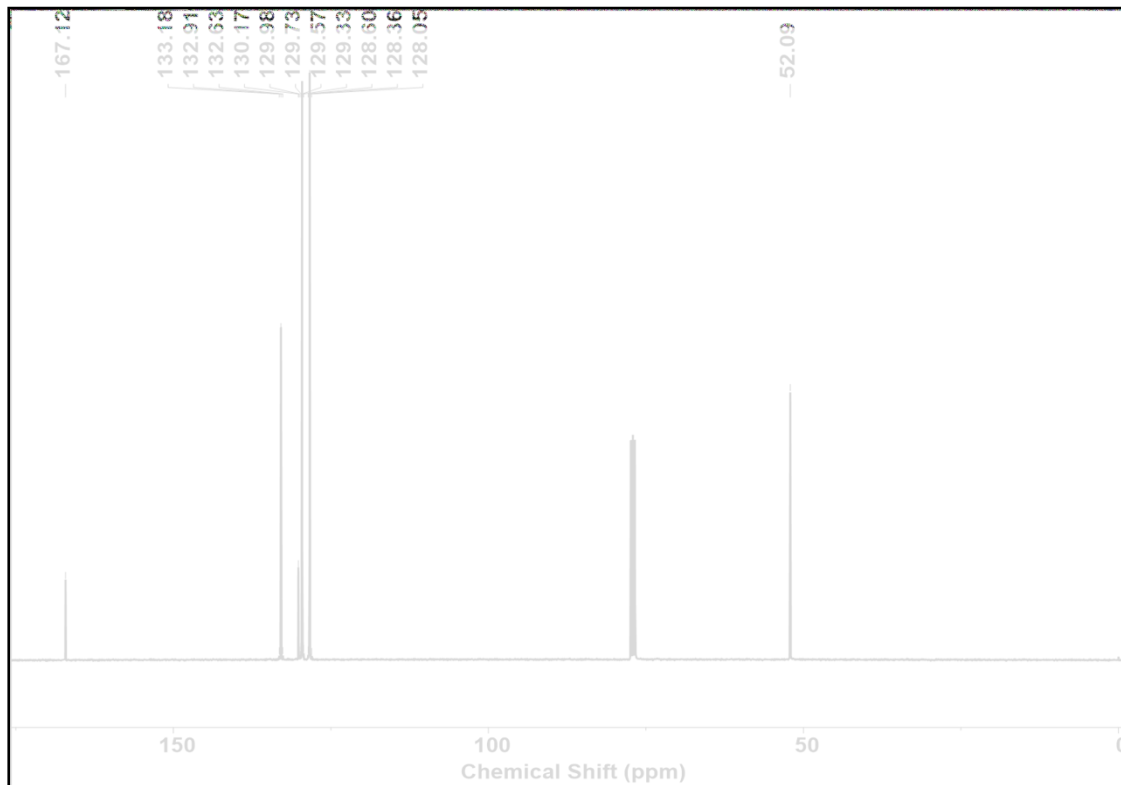

<sup>1</sup>H-NMR

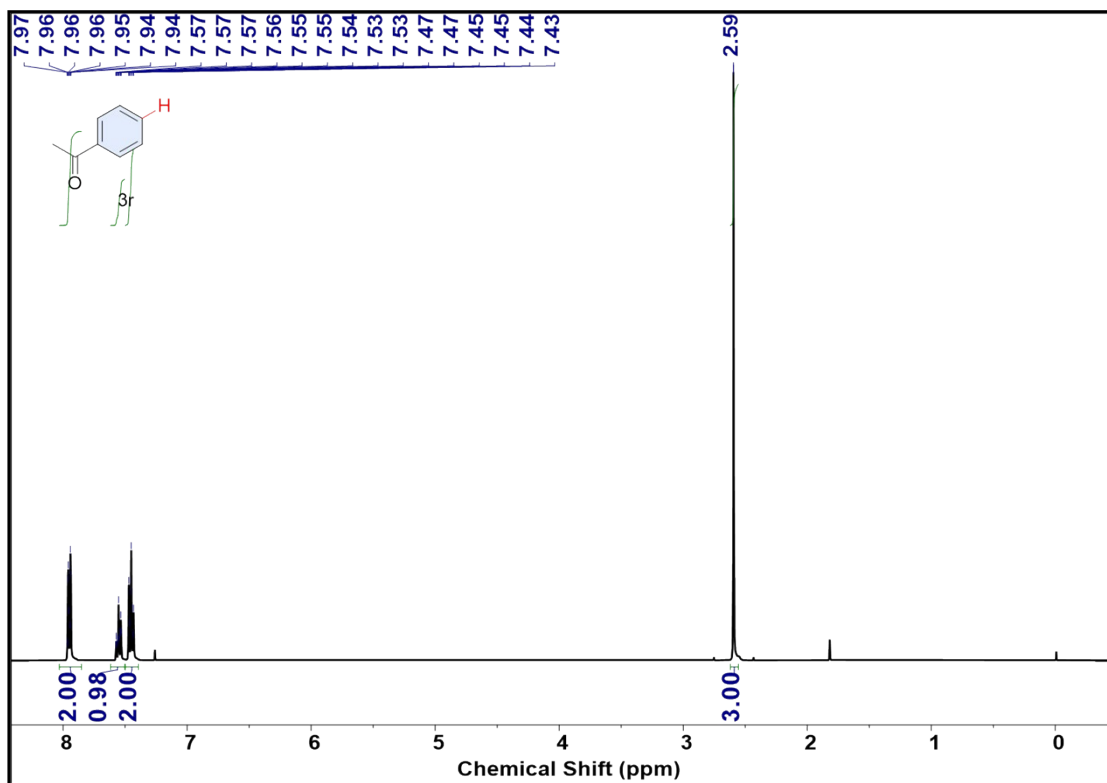

**<sup>13</sup>C-NMR**

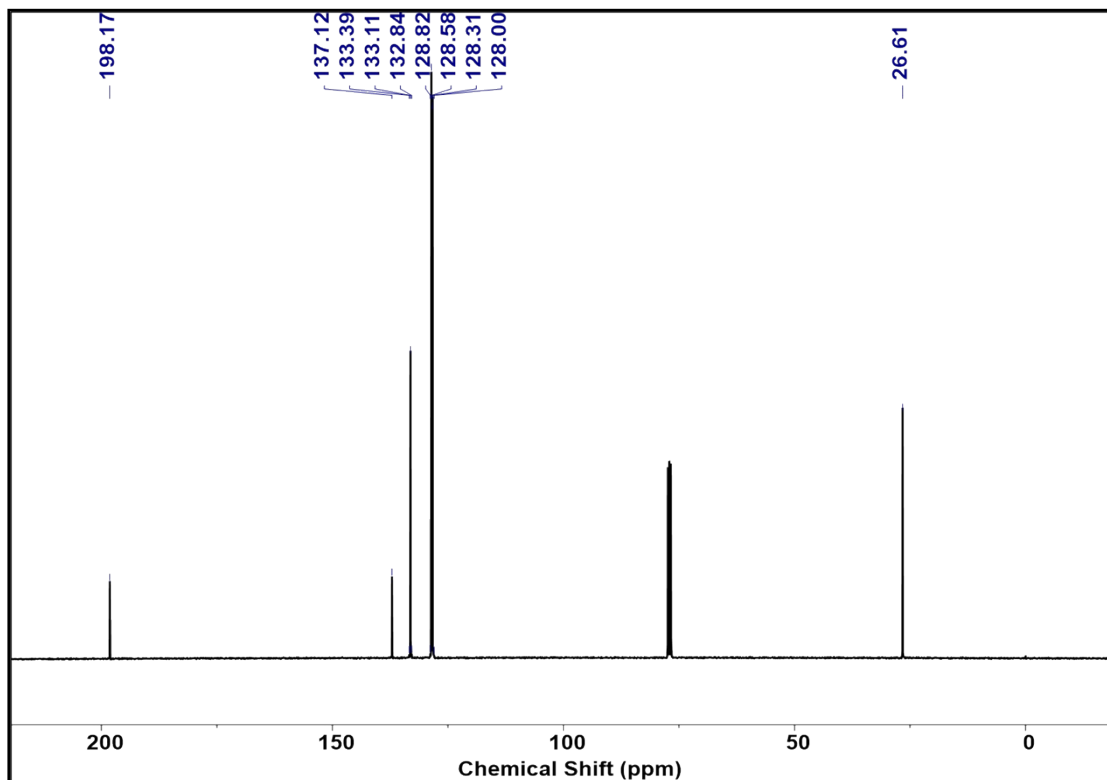

**<sup>1</sup>H-NMR**

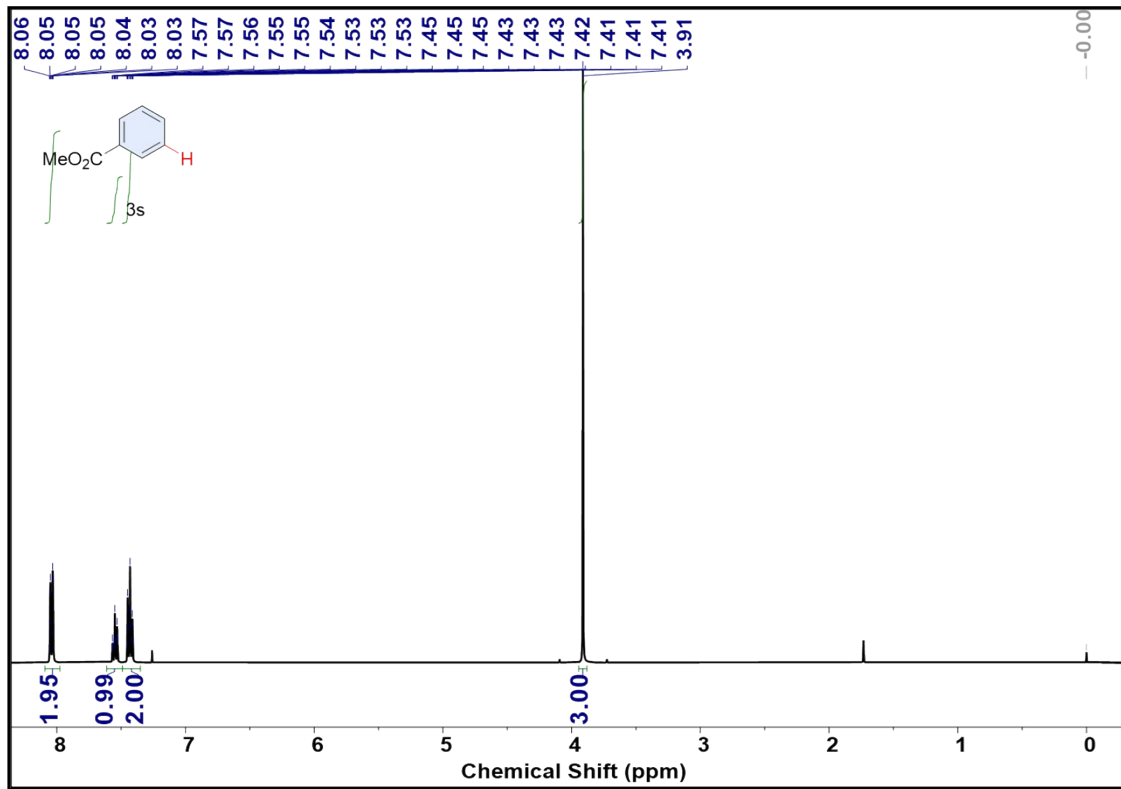

<sup>13</sup>C-NMR

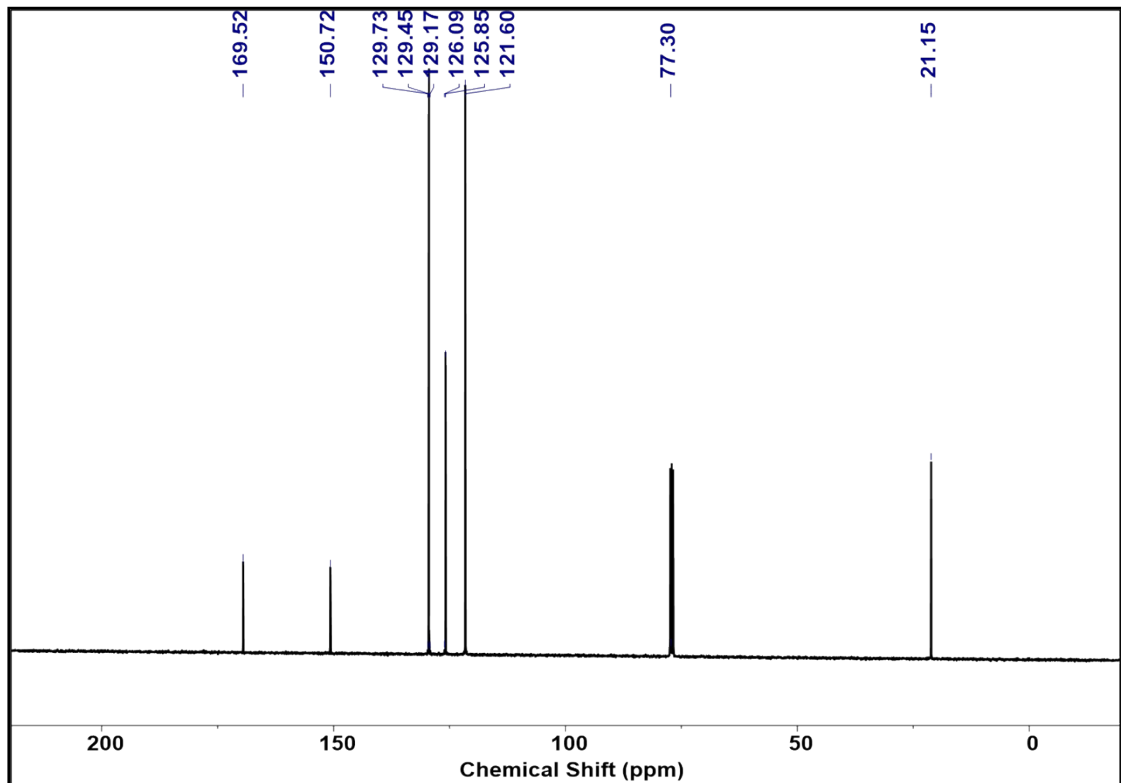

<sup>1</sup>H-NMR

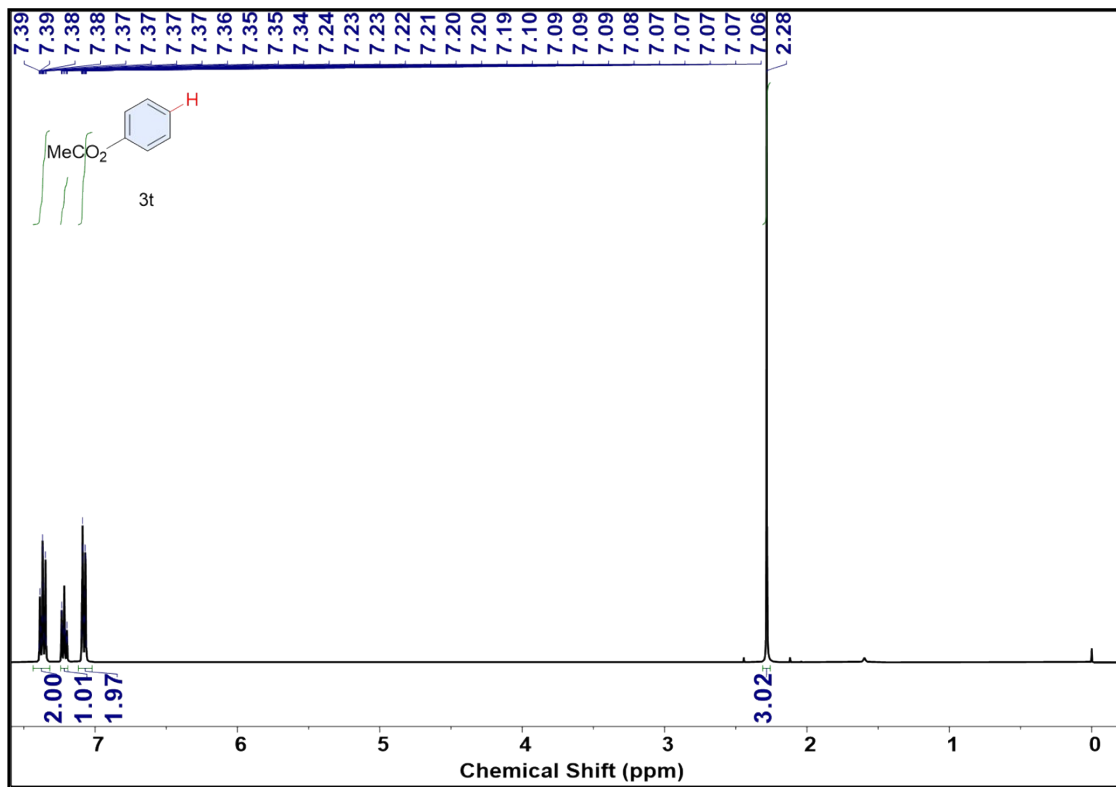

<sup>13</sup>C-NMR

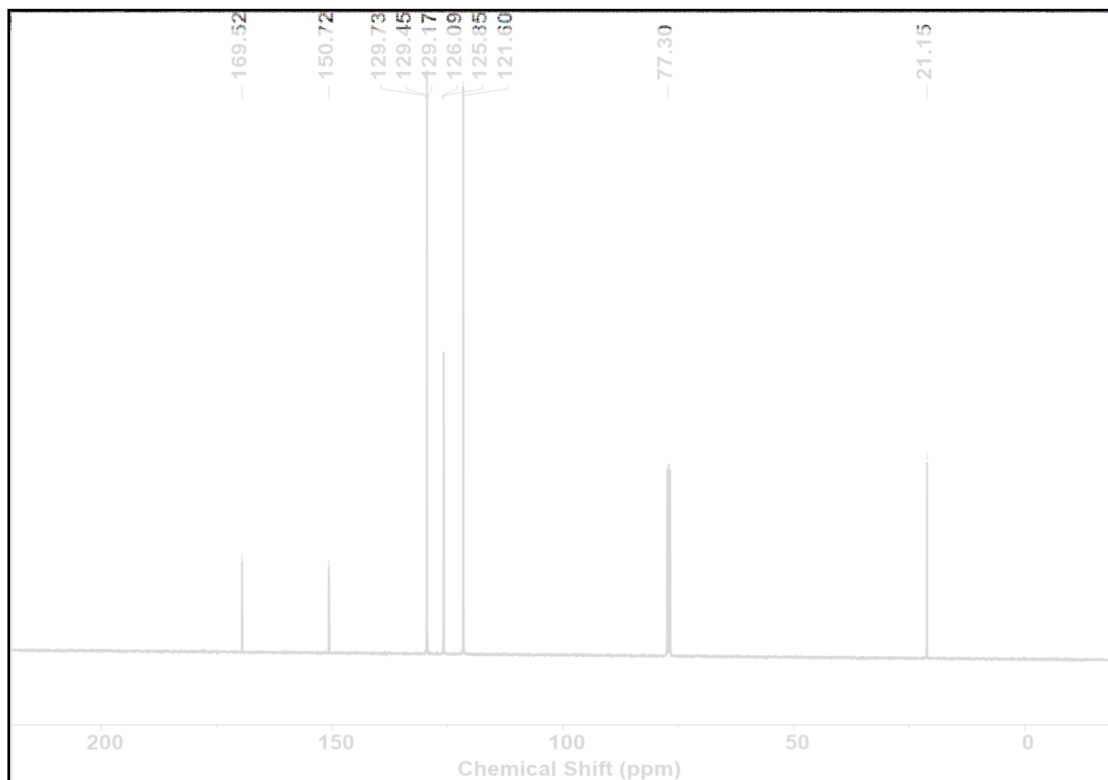

Supplement: d4cc01178c1.pdf [file d4cc01178c1.pdf]
